# Supplementary material for: Early myelination involves the dynamic and repetitive ensheathment of axons which resolves through a low and consistent stabilization rate
Source: eLife. 2023 Apr 20;12:e82111. doi: 10.7554/eLife.82111 (PMC10198724; doi:10.7554/eLife.82111)
Supplement: Figure 1—source data 1. [file elife-82111-fig1-data1.xlsx]

## Sheet: cell counts
Larvae number	Dorsal RFP+ oligodendrocyte cell count	Ventral RFP+ oligodendrocyte cell count
1	12	44
2	14	33
3	14	35
4	14	39
5	18	43
6	18	43
7	9	23
8	17	36
9	16	41
10	26	44
