# Supplementary material for: Early myelination involves the dynamic and repetitive ensheathment of axons which resolves through a low and consistent stabilization rate
Source: eLife. 2023 Apr 20;12:e82111. doi: 10.7554/eLife.82111 (PMC10198724; doi:10.7554/eLife.82111)
Supplement: Figure 1—source data 2. [file elife-82111-fig1-data2.xlsx]

## Sheet: Sheet1
Dorsal oligodendrocyte cell number	Sheath number	AVG sheath length	Total sheath length
1	10	15.2669	152.669
2	21	29.2452	614.149
3	20	21.8289	436.579
4	6	49.832	298.992
5	15	21.974	329.609
6	16	23.7834	380.534
7	17	35.1481	597.518
8	20	17.9951	359.902
9	17	31.222	530.775
10	14	37.7644	528.701
11	20	24.1103	482.206
12	20	35.2083	704.166
13	16	27.8047	444.874
14	15	31.9997	479.995
15	20	26.2607	525.214
16	7	48.4514	339.16
17	5	37.299	186.495
18	12	40.3575	484.29
19	17	31.2197	530.735
20	11	25.7691	283.46
21	19	28.9922	550.853
22	13	28.8708	375.32
23	13	36.8958	479.646
24	7	26.8768	188.138
25	4	45.4453	181.781
26	13	37.8676	492.279
27	13	27.4376	356.689
Ventral oligodendrocyte cell number	Sheath number	AVG sheath length	Total length
1	17	32.7438	556.644
2	10	36.1281	361.281
3	12	24.1339	289.607
4	13	47.7787	621.123
5	5	39.2088	196.044
6	7	27.7876	194.513
7	9	26.8399	241.559
8	10	33.3204	333.204
9	10	26.0187	260.187
10	18	28.4221	511.599
11	13	18.0326	234.424
12	14	39.4578	552.409
13	9	45.5363	409.827
14	9	31.8707	286.836
15	20	19.9379	398.758
16	7	26.9864	188.905
17	17	29.3688	499.269
18	11	35.9562	395.519
19	5	37.8898	189.449
20	19	40.1316	762.501
21	11	42.2361	464.597
22	5	58.4667	292.334
23	8	30.766	246.128
24	5	33.8375	169.187
25	16	22.5591	360.945
26	10	35.8125	358.125
