# Supplementary material for: Early myelination involves the dynamic and repetitive ensheathment of axons which resolves through a low and consistent stabilization rate
Source: eLife. 2023 Apr 20;12:e82111. doi: 10.7554/eLife.82111 (PMC10198724; doi:10.7554/eLife.82111)
Supplement: Figure 2—source data 1. [file elife-82111-fig2-data1.xlsx]

## Sheet: Sheet1
Fig 2E
Axon domain number	Total number of attempts on axon
1	3
2	4
3	2
4	3
5	1
6	3
7	6
8	1
9	3
10	3
11	4
12	5
13	3
14	2
15	1
16	3
17	1
18	4
19	2
20	2
21	1
22	1
23	5
24	4
25	1
Fig 2F and G
Number of ensheathment attempts on the same axonal domain	Stabilized domains	Destabilized domains
	4	6
	4	5
	4	5
	4	3
	3	3
	3	3
	3	1
	3	1
	2	1
	2	1
	2	1
	2
	1
	1
Summary
12	larvae
18	total axons
25	total axon domains
14	stabilized domains
11	destabilized domains
68	total ensheathment attempts
~2-14uM	axon domain length range
18	axon domains were repetitively ensheathed (72%)
	each one by a single oligodendrocyte
	14 (~78%) of these domains were repetitively ensheathed by the same oligo process
	Not clear if other 4 domains were ensheathed by the same process.
