# Supplementary material for: Early myelination involves the dynamic and repetitive ensheathment of axons which resolves through a low and consistent stabilization rate
Source: eLife. 2023 Apr 20;12:e82111. doi: 10.7554/eLife.82111 (PMC10198724; doi:10.7554/eLife.82111)
Supplement: Figure 3—figure supplement 1—source data 1. [file elife-82111-fig3-figsupp1-data1.xlsx]

## Sheet: Summary
	Figure 3.1 supp C		Figure 3.1 supp E
Larval number	Pre calcium transients	Post calcium transients	Percent comparison
Control larva 1	267	504	188.764
Control larva 2	42	35	83.3333
Control larva 3	99	47	47.4747
Control larva 4	66	150	227.273
Control larva 5	126	82	65.0794
Control larva 6	136	119	87.5
Control larva 7	49	48	97.9592
	Figure 3.1 supp D		Figure 3.1 supp E
Larval number	Pre calcium transients	Post calcium transients	Percent comparison
Spike larva 1	136	22	16.1765
Spike larva 2	221	9	4.0724
Spike larva 3	302	13	4.30464
Spike larva 4	158	7	4.43038
Spike larva 5	191	8	4.18848
Spike larva 6	268	185	69.0299
Spike larva 7	288	17	5.90278
Spike larva 8	507	33	6.50888
