# Supplementary material for: Early myelination involves the dynamic and repetitive ensheathment of axons which resolves through a low and consistent stabilization rate
Source: eLife. 2023 Apr 20;12:e82111. doi: 10.7554/eLife.82111 (PMC10198724; doi:10.7554/eLife.82111)
Supplement: Figure 3—figure supplement 2—source data 1. [file elife-82111-fig3-figsupp2-data1.xlsx]

## Sheet: Summary
		Fig 3.2 supp A			Fig 3.2 supp B	Fig 3.2 supp C			Fig 3.2 supp D				Figure 3.2 supp E				Fig 3.2 supp F				Figure 3.2 supp G
		Total axonal domains	Axonal domains ensheathed once	Axonal domains ensheathed more than once	Axonal domains ensheathed repetitively by same oligo	Axonal domains ensheathed repetitively by the same cellular process	Axonal domains ensheathed repetitively by a different cellular process	Axonal domains where it is unclear if it is repetitively ensheathed by the same cellular process	Axonal domains where process maintains contact with axon during repetitive ensheathment	Axonal domains where process does not maintain contact with axon during repetitive ensheathment	Axonal domains where it is unclear if the process maintains contact with axon during repetitive ensheathment		Figure 2 tricaine data	Axon domain	# of attempts	Stabilized?		Total ensheathment attempts	% stabilized attempts		# of processes that maintain contact with the axon and stabilize a sheath
	Figure 2 Tricaine data	25	7	18	18	14	0	4	14	0	4			2	4	stabilized	Figure 2 Tricaine data	68	20.5882	Figure 2 Tricaine data	10
	Figure 3 Tricaine data	37	10	27	27	17	5	5	17	5	5			3	2	stabilized	Figure 3 Tricaine data	93	17.2043	Figure 3 Tricaine data	8
	Tricaine data combined	62	17	45	45	31	5	9	31	5	9			6	3	stabilized	Figure 3 PanB data	63	25.3968	Figure 3 PanB data	10
	Figure 3 PanB data	29	10	19	19	13	3	3	12	4	3			10	3	stabilized	Total	224	20.5357	Total	28
			% Axonal domains ensheathed once	% Axonal domains ensheathed more than once	% Axonal domains ensheathed repetitively by same oligo	% Axonal domains ensheathed repetitively by the same cellular process	% Axonal domains ensheathed repetitively by a different cellular process	% Axonal domains where it is unclear if it is repetitively ensheathed by the same cellular process	% Axonal domains where process maintains contact with axon during repetitive ensheathment	% Axonal domains where process does not maintain contact with axon during repetitive ensheathment	% Axonal domains where it is unclear if the process maintains contact with axon during repetitive ensheathment			11	4	stabilized					% of processes that maintain contact with the axon and stabilize a sheath
	Figure 2 Tricaine data		28	72	100	77.7778	0	22.2222	77.7778	0	22.2222			13	3	stabilized				Figure 2 Tricaine data	71.4286
	Figure 3 Tricaine data		27.027	72.973	100	62.963	18.5185	18.5185	62.963	18.5185	18.5185			14	2	stabilized				Figure 3 Tricaine data	47.0588
	Tricaine data combined		27.4194	72.5806	100	68.8889	11.1111	20	68.8889	11.1111	20			15	1	stabilized				Figure 3 PanB data	83.3333
	Figure 3 PanB data		34.4828	65.5172	100	68.4211	15.7895	15.7895	63.1579	21.0526	15.7895			16	3	stabilized				Total	65.1163
														18	4	stabilized
														19	2	stabilized
														20	2	stabilized
														22	1	stabilized
														24	4	stabilized
														1	3	destabilized
														4	3	destabilized
														5	1	destabilized
														7	6	destabilized
														8	1	destabilized
														9	3	destabilized
														12	5	destabilized
														17	1	destabilized
														21	1	destabilized
														23	5	destabilized
														25	1	destabilized
													Figure 3 data	Axon domain	# of attempts	Stabilized?
														Tric_axon_2_domain_1	1	stabilized
														Tric_axon_3_domain_1	2	stabilized
														Tric_axon_5_domain_1	2	stabilized
														Tric_axon_10_domain_1	2	stabilized
														Tric_axon_12_domain_1	2	stabilized
														Tric_axon_13_domain_1	3	stabilized
														Tric_axon_13_domain_2_figure	3	stabilized
														Tric_axon_14_domain_2	2	stabilized
														Tric_axon_14_domain_4	2	stabilized
														Tric_axon_15_domain_1	1	stabilized
														Tric_axon_15_domain_3	5	stabilized
														Tric_axon_17_domain_1	4	stabilized
														Tric_axon_17_domain_2	2	stabilized
														Tric_axon_17_domain_4	1	stabilized
														Tric_axon_20_domain_2	2	stabilized
														Tric_axon_21_domain_1	1	stabilized
														Tric_axon_1_domain_1	1	destabilized
														Tric_axon_4_domain_1	3	destabilized
														Tric_axon_6_domain_1	3	destabilized
														Tric_axon_7_domain_1	4	destabilized
														Tric_axon_8_domain_1	2	destabilized
														Tric_axon_8_domain_2	3	destabilized
														Tric_axon_8_domain_3	2	destabilized
														Tric_axon_8_domain_4	4	destabilized
														Tric_axon_9_domain_1	5	destabilized
														Tric_axon_11_domain_1	1	destabilized
														Tric_axon_11_domain_2	3	destabilized
														Tric_axon_13_domain_3	1	destabilized
														Tric_axon_14_domain_1	3	destabilized
														Tric_axon_14_domain_3	3	destabilized
														Tric_axon_15_domain_2	1	destabilized
														Tric_axon_16_domain_1	1	destabilized
														Tric_axon_17_domain_3	1	destabilized
														Tric_axon_18_domain_1	6	destabilized
														Tric_axon_18_domain_2	4	destabilized
														Tric_axon_19_domain_1	2	destabilized
														Tric_axon_20_domain_1	5	destabilized
														PanB_axon_1_domain_1	2	stabilized
														PanB_axon_1_domain_2	1	stabilized
														PanB_axon_2_domain_1	2	stabilized
														PanB_axon_3_domain_1	1	stabilized
														PanB_axon_4_domain_1	4	stabilized
														PanB_axon_5_domain_1	1	stabilized
														PanB_axon_6_domain_1	2	stabilized
														PanB_axon_9_domain_2	2	stabilized
														PanB_axon_14_domain_1_figure	3	stabilized
														PanB_axon_15_domain_1	2	stabilized
														PanB_axon_15_domain_2	1	stabilized
														PanB_axon_15_domain_3	2	stabilized
														PanB_axon_15_domain_4	3	stabilized
														PanB_axon_15_domain_5	3	stabilized
														PanB_axon_17_domain_1	2	stabilized
														PanB_axon_19_domain_1	1	stabilized
														PanB_axon_1_domain_3	1	destabilized
														PanB_axon_7_domain_1	1	destabilized
														PanB_axon_8_domain_1	4	destabilized
														PanB_axon_9_domain_1	5	destabilized
														PanB_axon_10_domain_1	1	destabilized
														PanB_axon_11_domain_1	3	destabilized
														PanB_axon_12_domain_1	1	destabilized
														PanB_axon_13_domain_1	2	destabilized
														PanB_axon_16_domain_1	2	destabilized
														PanB_axon_16_domain_2	3	destabilized
														PanB_axon_16_domain_3	4	destabilized
														PanB_axon_18_domain_1	3	destabilized
														PanB_axon_20_domain_1	1	destabilized
