# Supplementary material for: Early myelination involves the dynamic and repetitive ensheathment of axons which resolves through a low and consistent stabilization rate
Source: eLife. 2023 Apr 20;12:e82111. doi: 10.7554/eLife.82111 (PMC10198724; doi:10.7554/eLife.82111)
Supplement: Figure 3—figure supplement 3—source data 1. [file elife-82111-fig3-figsupp3-data1.xlsx]

## Sheet: Summary
	Figure 3.3 supp B and C
Figure 2 tricaine data	Axon domain	fw1/3m (microns)	# of attempts	Stabilized?
	1	0.543795	3	destabilized
	2	0.699165	4	stabilized
	3	0.62148	2	stabilized
	4	0.699165	3	destabilized
	5	0.77685	1	destabilized
	6	0.62148	3	stabilized
	7	0.93222	6	destabilized
	8	0.93222	1	destabilized
	9	0.93222	3	destabilized
	10	1.00991	3	stabilized
	11	0.93222	4	stabilized
	12	0.62148	5	destabilized
	13	0.93222	3	stabilized
	14	0.77685	2	stabilized
	15	0.93222	1	stabilized
	16	1.08759	3	stabilized
	17	1.32065	1	destabilized
	18	0.854535	4	stabilized
	19	0.699165	2	stabilized
	20	0.62148	2	stabilized
	21	0.93222	1	destabilized
	22	0.854535	1	stabilized
	23	0.93222	5	destabilized
	24	0.854535	4	stabilized
	25	0.62148	1	destabilized
Figure 3 data	Axon domain	fw1/3m (microns)	# of attempts	Stabilized?
	Tric_axon_1_domain_1	0.854535	1	destabilized
	Tric_axon_2_domain_1	0.854535	1	stabilized
	Tric_axon_3_domain_1	0.77685	2	stabilized
	Tric_axon_4_domain_1	0.93222	3	destabilized
	Tric_axon_5_domain_1	1.08759	2	stabilized
	Tric_axon_6_domain_1	0.77685	3	destabilized
	Tric_axon_7_domain_1	0.62148	4	destabilized
	Tric_axon_8_domain_1	0.77685	2	destabilized
	Tric_axon_8_domain_2	0.62148	3	destabilized
	Tric_axon_8_domain_3	0.854535	2	destabilized
	Tric_axon_8_domain_4	0.77685	4	destabilized
	Tric_axon_9_domain_1	0.854535	5	destabilized
	Tric_axon_10_domain_1	0.93222	2	stabilized
	Tric_axon_11_domain_1	0.543795	1	destabilized
	Tric_axon_11_domain_2	0.62148	3	destabilized
	Tric_axon_12_domain_1	0.699165	2	stabilized
	Tric_axon_13_domain_1	0.699165	3	stabilized
	Tric_axon_13_domain_2	0.77685	3	stabilized
	Tric_axon_13_domain_3	0.77685	1	destabilized
	Tric_axon_14_domain_1	1.08759	3	destabilized
	Tric_axon_14_domain_2	1.00991	2	stabilized
	Tric_axon_14_domain_3	0.854535	3	destabilized
	Tric_axon_14_domain_4	0.854535	2	stabilized
	Tric_axon_15_domain_1	0.93222	1	stabilized
	Tric_axon_15_domain_2	1.16528	1	destabilized
	Tric_axon_15_domain_3	1.08759	5	stabilized
	Tric_axon_16_domain_1	1.08759	1	destabilized
	Tric_axon_17_domain_1	1.16528	4	stabilized
	Tric_axon_17_domain_2	0.93222	2	stabilized
	Tric_axon_17_domain_3	1.08759	1	destabilized
	Tric_axon_17_domain_4	1.08759	1	stabilized
	Tric_axon_18_domain_1	0.77685	6	destabilized
	Tric_axon_18_domain_2	0.62148	4	destabilized
	Tric_axon_19_domain_1	0.46611	2	destabilized
	Tric_axon_20_domain_1	0.699165	5	destabilized
	Tric_axon_20_domain_2	0.854535	2	stabilized
	Tric_axon_21_domain_1	0.699165	1	stabilized
	PanB_axon_1_domain_1	1.08759	2	stabilized
	PanB_axon_1_domain_2	1.08759	1	stabilized
	PanB_axon_1_domain_3	1.08759	1	destabilized
	PanB_axon_2_domain_1	1.00991	2	stabilized
	PanB_axon_3_domain_1	0.77685	1	stabilized
	PanB_axon_4_domain_1	1.00991	4	stabilized
	PanB_axon_5_domain_1	0.699165	1	stabilized
	PanB_axon_6_domain_1	0.699165	2	stabilized
	PanB_axon_7_domain_1	0.699165	1	destabilized
	PanB_axon_8_domain_1	0.93222	4	destabilized
	PanB_axon_9_domain_1	0.854535	5	destabilized
	PanB_axon_9_domain_2	0.543795	2	stabilized
	PanB_axon_10_domain_1	0.62148	1	destabilized
	PanB_axon_11_domain_1	1.00991	3	destabilized
	PanB_axon_12_domain_1	0.46611	1	destabilized
	PanB_axon_13_domain_1	0.543795	2	destabilized
	PanB_axon_14_domain_1	0.699165	3	stabilized
	PanB_axon_15_domain_1	0.699165	2	stabilized
	PanB_axon_15_domain_2	0.77685	1	stabilized
	PanB_axon_15_domain_3	0.77685	2	stabilized
	PanB_axon_15_domain_4	0.46611	3	stabilized
	PanB_axon_15_domain_5	0.543795	3	stabilized
	PanB_axon_16_domain_1	0.77685	2	destabilized
	PanB_axon_16_domain_2	0.854535	3	destabilized
	PanB_axon_16_domain_3	0.93222	4	destabilized
	PanB_axon_17_domain_1	0.699165	2	stabilized
	PanB_axon_18_domain_1	1.00991	3	destabilized
	PanB_axon_19_domain_1	0.77685	1	stabilized
	PanB_axon_20_domain_1	1.00991	1	destabilized

## Sheet: Summary_reorganized
Figure 3.3 supp A			Figure 3.3 supp B and C
Line scan position (microns)	Fluorescent intensity (AU)		Figure 2 tricaine data	Axon domain	fw1/3m (microns)	# of attempts	Stabilized?
0	113.172			2	0.699165	4	stabilized
0.15537	13.172			3	0.62148	2	stabilized
0.31074	215.339			6	0.62148	3	stabilized
0.46611	194.339			10	1.00991	3	stabilized
0.62148	719.172			11	0.93222	4	stabilized
0.77685	1022.01			13	0.93222	3	stabilized
0.93222	1303.67			14	0.77685	2	stabilized
1.08759	1514.67			15	0.93222	1	stabilized
1.24296	1072.84			16	1.08759	3	stabilized
1.39833	655.005			18	0.854535	4	stabilized
1.5537	342.505			19	0.699165	2	stabilized
1.70907	127.505			20	0.62148	2	stabilized
1.86444	216.339			22	0.854535	1	stabilized
				24	0.854535	4	stabilized
				1	0.543795	3	destabilized
				4	0.699165	3	destabilized
				5	0.77685	1	destabilized
				7	0.93222	6	destabilized
				8	0.93222	1	destabilized
				9	0.93222	3	destabilized
				12	0.62148	5	destabilized
				17	1.32065	1	destabilized
				21	0.93222	1	destabilized
				23	0.93222	5	destabilized
				25	0.62148	1	destabilized
			Figure 3 data	Axon domain	fw1/3m (microns)	# of attempts	Stabilized?
				Tric_axon_2_domain_1	0.854535	1	stabilized
				Tric_axon_3_domain_1	0.77685	2	stabilized
				Tric_axon_5_domain_1	1.08759	2	stabilized
				Tric_axon_10_domain_1	0.93222	2	stabilized
				Tric_axon_12_domain_1	0.699165	2	stabilized
				Tric_axon_13_domain_1	0.699165	3	stabilized
				Tric_axon_13_domain_2_figure	0.77685	3	stabilized
				Tric_axon_14_domain_2	1.00991	2	stabilized
				Tric_axon_14_domain_4	0.854535	2	stabilized
				Tric_axon_15_domain_1	0.93222	1	stabilized
				Tric_axon_15_domain_3	1.08759	5	stabilized
				Tric_axon_17_domain_1	1.16528	4	stabilized
				Tric_axon_17_domain_2	0.93222	2	stabilized
				Tric_axon_17_domain_4	1.08759	1	stabilized
				Tric_axon_20_domain_2	0.854535	2	stabilized
				Tric_axon_21_domain_1	0.699165	1	stabilized
				Tric_axon_1_domain_1	0.854535	1	destabilized
				Tric_axon_4_domain_1	0.93222	3	destabilized
				Tric_axon_6_domain_1	0.77685	3	destabilized
				Tric_axon_7_domain_1	0.62148	4	destabilized
				Tric_axon_8_domain_1	0.77685	2	destabilized
				Tric_axon_8_domain_2	0.62148	3	destabilized
				Tric_axon_8_domain_3	0.854535	2	destabilized
				Tric_axon_8_domain_4	0.77685	4	destabilized
				Tric_axon_9_domain_1	0.854535	5	destabilized
				Tric_axon_11_domain_1	0.543795	1	destabilized
				Tric_axon_11_domain_2	0.62148	3	destabilized
				Tric_axon_13_domain_3	0.77685	1	destabilized
				Tric_axon_14_domain_1	1.08759	3	destabilized
				Tric_axon_14_domain_3	0.854535	3	destabilized
				Tric_axon_15_domain_2	1.16528	1	destabilized
				Tric_axon_16_domain_1	1.08759	1	destabilized
				Tric_axon_17_domain_3	1.08759	1	destabilized
				Tric_axon_18_domain_1	0.77685	6	destabilized
				Tric_axon_18_domain_2	0.62148	4	destabilized
				Tric_axon_19_domain_1	0.46611	2	destabilized
				Tric_axon_20_domain_1	0.699165	5	destabilized
				PanB_axon_1_domain_1	1.08759	2	stabilized
				PanB_axon_1_domain_2	1.08759	1	stabilized
				PanB_axon_2_domain_1	1.00991	2	stabilized
				PanB_axon_3_domain_1	0.77685	1	stabilized
				PanB_axon_4_domain_1	1.00991	4	stabilized
				PanB_axon_5_domain_1	0.699165	1	stabilized
				PanB_axon_6_domain_1	0.699165	2	stabilized
				PanB_axon_9_domain_2	0.543795	2	stabilized
				PanB_axon_14_domain_1_figure	0.699165	3	stabilized
				PanB_axon_15_domain_1	0.699165	2	stabilized
				PanB_axon_15_domain_2	0.77685	1	stabilized
				PanB_axon_15_domain_3	0.77685	2	stabilized
				PanB_axon_15_domain_4	0.46611	3	stabilized
				PanB_axon_15_domain_5	0.543795	3	stabilized
				PanB_axon_17_domain_1	0.699165	2	stabilized
				PanB_axon_19_domain_1	0.77685	1	stabilized
				PanB_axon_1_domain_3	1.08759	1	destabilized
				PanB_axon_7_domain_1	0.699165	1	destabilized
				PanB_axon_8_domain_1	0.93222	4	destabilized
				PanB_axon_9_domain_1	0.854535	5	destabilized
				PanB_axon_10_domain_1	0.62148	1	destabilized
				PanB_axon_11_domain_1	1.00991	3	destabilized
				PanB_axon_12_domain_1	0.46611	1	destabilized
				PanB_axon_13_domain_1	0.543795	2	destabilized
				PanB_axon_16_domain_1	0.77685	2	destabilized
				PanB_axon_16_domain_2	0.854535	3	destabilized
				PanB_axon_16_domain_3	0.93222	4	destabilized
				PanB_axon_18_domain_1	1.00991	3	destabilized
				PanB_axon_20_domain_1	1.00991	1	destabilized
