# Supplementary material for: Early myelination involves the dynamic and repetitive ensheathment of axons which resolves through a low and consistent stabilization rate
Source: eLife. 2023 Apr 20;12:e82111. doi: 10.7554/eLife.82111 (PMC10198724; doi:10.7554/eLife.82111)
Supplement: Figure 3—source data 1. [file elife-82111-fig3-data1.xlsx]

## Sheet: summary
	Figure 3D	Figure 3E	Figure 3F	Figure 3F
Axon_domain number	Total number of attempts on axonal domain	Total attempts_normalized by axon	Stabilized/destabilized		Stabilized domains	destabilized domains	Total domains	% stabilized domains	% destabilized domains
Tric_axon_1_domain_1	1	1	destabilized	Tricaine	16	21	37	43.2432	56.7568
Tric_axon_2_domain_1	1	1	stabilized	PanB	16	13	29	55.1724	44.8276
Tric_axon_3_domain_1	2	2	stabilized
Tric_axon_4_domain_1	3	3	destabilized
Tric_axon_5_domain_1	2	2	stabilized
Tric_axon_6_domain_1	3	3	destabilized
Tric_axon_7_domain_1	4	4	destabilized
Tric_axon_8_domain_1-3	2	2.75	destabilized
	3		destabilized
	2		destabilized
Tric_axon_8_domain_4	4		destabilized
Tric_axon_9_domain_1	5	5	destabilized
Tric_axon_10_domain_1	2	2	stabilized
Tric_axon_11_domain_1-2	1	2	destabilized
	3		destabilized
Tric_axon_12_domain_1	2	2	stabilized
Tric_axon_13_domain_1	3	2.33333	stabilized
Tric_axon_13_domain_2-3	3		stabilized
	1		destabilized
Tric_axon_14_domain_1-2	3	2.5	destabilized
	2		stabilized
Tric_axon_14_domain_3	3		destabilized
Tric_axon_14_domain_4	2		stabilized
Tric_axon_15_domain_1-3	1	2.33333	stabilized
	1		destabilized
	5		stabilized
Tric_axon_16_domain_1	1	1	destabilized
Tric_axon_17_domain_1-3	4	2	stabilized
	2		stabilized
	1		destabilized
Tric_axon_17_domain_4	1		stabilized
Tric_axon_18_domain_1-2	6	5	destabilized
	4		destabilized
Tric_axon_19_domain_1	2	2	destabilized
Tric_axon_20_domain_1-2	5	3.5	destabilized
	2		stabilized
Tric_axon_21_domain_1	1	1	stabilized
PanB_axon_1_domain_1-2	2	1.33333	stabilized
	1		stabilized
PanB_axon_1_domain_3	1		destabilized
PanB_axon_2_domain_1	2	2	stabilized
PanB_axon_3_domain_1	1	1	stabilized
PanB_axon_4_domain_1	4	4	stabilized
PanB_axon_5_domain_1	1	1	stabilized
PanB_axon_6_domain_1	2	2	stabilized
PanB_axon_7_domain_1	1	1	destabilized
PanB_axon_8_domain_1	4	4	destabilized
PanB_axon_9_domain_1	5	3.5	destabilized
PanB_axon_9_domain_2	2		stabilized
PanB_axon_10_domain_1	1	1	destabilized
PanB_axon_11_domain_1	3	3	destabilized
PanB_axon_12_domain_1	1	1	destabilized
PanB_axon_13_domain_1	2	2	destabilized
PanB_axon_14_domain_1	3	3	stabilized
PanB_axon_15_domain_1-5	2	2.2	stabilized
	1		stabilized
	2		stabilized
	3		stabilized
	3		stabilized
PanB_axon_16_domain_1	2	3	destabilized
PanB_axon_16_domain_2-3	3		destabilized
	4		destabilized
PanB_axon_17_domain_1	2	2	stabilized
PanB_axon_18_domain_1	3	3	destabilized
PanB_axon_19_domain_1	1	1	stabilized
PanB_axon_20_domain_1	1	1	destabilized
