# Supplementary material for: Early myelination involves the dynamic and repetitive ensheathment of axons which resolves through a low and consistent stabilization rate
Source: eLife. 2023 Apr 20;12:e82111. doi: 10.7554/eLife.82111 (PMC10198724; doi:10.7554/eLife.82111)
Supplement: Figure 4—figure supplement 1—source data 1. [file elife-82111-fig4-figsupp1-data1.xlsx]

## Sheet: Standard
Dorsal oligodendrocyte cell number	Sheath number	AVG sheath length	Total sheath length
1	10	15.2669	152.669
2	21	29.2452	614.149
3	20	21.8289	436.579
4	6	49.832	298.992
5	15	21.974	329.609
6	16	23.7834	380.534
7	17	35.1481	597.518
8	20	17.9951	359.902
9	17	31.222	530.775
10	14	37.7644	528.701
11	20	24.1103	482.206
12	20	35.2083	704.166
13	16	27.8047	444.874
14	15	31.9997	479.995
15	20	26.2607	525.214
16	7	48.4514	339.16
17	5	37.299	186.495
18	12	40.3575	484.29
19	17	31.2197	530.735
20	11	25.7691	283.46
21	19	28.9922	550.853
22	13	28.8708	375.32
23	13	36.8958	479.646
24	7	26.8768	188.138
25	4	45.4453	181.781
26	13	37.8676	492.279
27	13	27.4376	356.689
Ventral oligodendrocyte cell number	Sheath number	AVG sheath length	Total sheath length
1	17	32.7438	556.644
2	10	36.1281	361.281
3	12	24.1339	289.607
4	13	47.7787	621.123
5	5	39.2088	196.044
6	7	27.7876	194.513
7	9	26.8399	241.559
8	10	33.3204	333.204
9	10	26.0187	260.187
10	18	28.4221	511.599
11	13	18.0326	234.424
12	14	39.4578	552.409
13	9	45.5363	409.827
14	9	31.8707	286.836
15	20	19.9379	398.758
16	7	26.9864	188.905
17	17	29.3688	499.269
18	11	35.9562	395.519
19	5	37.8898	189.449
20	19	40.1316	762.501
21	11	42.2361	464.597
22	5	58.4667	292.334
23	8	30.766	246.128
24	5	33.8375	169.187
25	16	22.5591	360.945
26	10	35.8125	358.125

## Sheet: agar_tricaine
Dorsal oligodendrocyte cell number	Sheath number	AVG sheath length	Total sheath length
1	20	24.2043	484.085
2	13	27.8291	361.778
3	12	29.0917	349.1
4	10	42.0716	420.716
5	11	30.5886	336.475
6	9	37.2322	335.09
7	17	26.5722	451.727
8	18	34.6559	623.806
9	10	27.2964	272.964
10	10	33.2852	332.852
11	20	34.6632	693.264
12	18	34.9567	629.221
13	24	31.7358	761.66
14	15	43.3028	649.542
15	9	44.4833	400.35
16	19	24.0219	456.416
17	13	33.4991	435.488
18	12	23.3267	279.92
19	8	39.5583	316.467
20	19	37.7414	264.19
21	14	27.6322	386.851
22	8	49.4383	395.507
23	6	40.8274	244.964
24	13	38.016	494.208
25	15	35.4056	531.085
26	11	31.8537	350.39
27	5	33.6379	168.19
Ventral oligodendrocyte cell number	Sheath number	AVG sheath length	Total sheath length
1	6	30.2873	181.724
2	7	44.6517	312.562
3	21	27.3156	573.627
4	11	31.2229	343.452
5	5	55.5027	277.513
6	9	20.9209	188.288
7	10	34.4615	344.615
8	15	27.1466	407.199
9	12	20.9	250.8
10	6	30.9277	185.566
11	19	38.9467	739.988
12	6	32.2233	193.34
13	13	33.1597	431.076
14	6	53.4049	320.429
15	15	24.5029	367.544
16	5	37.118	185.59
17	7	39.5954	277.168
18	8	41.8074	334.459
19	12	38.9904	467.885
20	7	42.2997	296.098
21	7	35.2781	246.947
22	14	27.4817	384.744
23	10	37.9016	379.016
24	11	54.6776	601.453

## Sheet: time-lapse
Dorsal oligodendrocyte cell number	Sheath number	AVG sheath length	Total sheath length
1	13	33.7066	438.186
2	11	33.0649	363.714
3	5	11.5683	57.8415
4	11	35.3314	388.645
5	15	37.8287	567.431
6	16	30.9032	494.451
7	12	36.8783	442.54
8	10	29.8478	298.478
9	24	30.1914	724.593
10	18	37.1825	669.285
11	15	37.6168	564.252
12	14	25.8857	362.4
13	17	28.2825	480.803
14	12	31.6654	379.985
15	14	35.0856	491.198
16	15	34.4948	517.422
17	13	41.4514	538.868
18	8	35.1506	281.205
19	11	32.4588	357.047
Ventral oligodendrocyte cell number	Sheath number	AVG sheath length	Total sheath length
1	8	39.9168	319.334
2	11	32.6258	358.883
3	6	24.146	144.876
4	12	22.0677	264.813
5	5	37.9747	189.874
6	6	32.8721	197.233
7	12	20.9472	251.366
8	11	42.0943	463.037
9	9	34.4697	310.227
10	18	39.1548	704.786
11	9	38.064	342.576
12	10	34.6367	346.367
13	16	25.6271	410.034
14	13	45.6107	592.939
15	7	31.0545	217.382
16	11	45.1172	496.29
17	8	30.9	247.2
18	12	25.6304	307.565
