# Supplementary material for: Early myelination involves the dynamic and repetitive ensheathment of axons which resolves through a low and consistent stabilization rate
Source: eLife. 2023 Apr 20;12:e82111. doi: 10.7554/eLife.82111 (PMC10198724; doi:10.7554/eLife.82111)
Supplement: Figure 5—source data 1. [file elife-82111-fig5-data1.xlsx]

## Sheet: Fig 5A
Dorsal oligodendrocyte cell number	Sheath accumulation time per cell (hours)
1	4.83
2	4.42
3	7.5
4	4.58
5	4.5
6	4.33
7	4.25
8	7.58
9	6.75
10	6.08
11	5.33
12	7.42
13	6.91667
14	6.25
15	5.33333
16	5.41667
17	5.08333
18	4.75
19	8.33333
Ventral oligodendrocyte cell number	Sheath accumulation time per cell (hours)
1	4.67
2	5.83333
3	5.25
4	8.17
5	7.92
6	3.42
7	5.92
8	5.25
9	7.58
10	5.92
11	6.92
12	5.75
13	8
14	4.33333
15	5.58333
16	5.58333
17	4.5
18	4.16667

## Sheet: Fig 5B
Dorsal oligodendrocyte cell number	Normalized Frame #	-101	-100	-99	-98	-97	-96	-95	-94	-93	-92	-91	-90	-89	-88	-87	-86	-85	-84	-83	-82	-81	-80	-79	-78	-77	-76	-75	-74	-73	-72	-71	-70	-69	-68	-67	-66	-65	-64	-63	-62	-61	-60	-59	-58	-57	-56	-55	-54
1	Average number of ensheathments																																												1	1	2	2	1
2
3													4	3	3	1	2	1	1	1	2	2	3	3	2	2	2	2	2	3	3	3	3	2	2	4	4	4	4	4	4	4	4	4	4	4	4	4	4
4																																																1	1
5																																																	1
6
7
8												2	0	0	1	0	0	1	0	0	1	1	0	0	0	1	1	1	1	0	0	0	0	0	1	1	1	1	0	0	1	1	2	0	0	1	2	2	0
9																						1	1	1	1	0	0	0	1	0	1	1	1	3	2	2	0	1	1	1	2	2	1	2	0	2	4	3	3
10																														1	1	1	1	1	0	0	0	2	2	3	2	2	5	4	2	3	2	1	4
11																																							1	2	1	2	2	2	0	5	8	7	7
12														1	0	0	0	0	1	1	0	0	1	0	0	0	2	1	0	0	2	4	1	2	3	3	2	5	3	2	5	5	4	5	5	6	6	2	4
13																				1	2	1	1	1	3	2	1	1	1	1	2	0	2	2	3	4	3	2	2	2	3	3	0	2	3	2	2	2	3
14																												1	1	0	0	1	0	0	0	1	2	2	0	2	1	2	0	0	0	1	1	1	1
15																																							1	1	1	0	0	0	2	1	1	2	2
16																																						1	1	0	1	2	3	2	3	2	2	4	3
17																																										1	0	2	2	3	4	3	2
18																																														1	1	1	1
19		0	1	1	2	3	3	2	2	1	3	4	6	8	9	9	10	11	10	11	14	14	14	16	15	17	14	12	15	15	15	17	17	18	14	14	15	17	17	17	15	16	16	17	18	19	19	19	19
	AVG	0	1	1	2	3	3	2	2	1	3	3	3.33333	3	3.25	2.5	3	3.25	3	2.8	3.8	3.16667	3.33333	3.5	3.5	3.66667	3.33333	2.57143	3	2.5	3	3.375	3.125	3.5	3.125	3.625	3.375	3.88889	2.90909	3.09091	3.27273	3.33333	3.08333	3.33333	3.07692	3.64286	4.14286	3.6	3.5
	STDEV	#DIV/0!	#DIV/0!	#DIV/0!	#DIV/0!	#DIV/0!	#DIV/0!	#DIV/0!	#DIV/0!	#DIV/0!	#DIV/0!	1.41421	3.05505	3.55903	4.03113	4.3589	4.76095	5.18813	4.69042	4.60435	5.76194	5.34478	5.31664	6.22093	5.75326	6.59293	5.27889	4.1975	5.32291	5.15475	4.95696	5.68048	5.69304	5.95219	4.54933	4.43807	4.89716	5.1099	4.82607	4.7635	4.12531	4.20678	4.44069	4.59908	4.76902	4.70036	4.73704	4.54816	4.48702
	Normalized Time (hours)	-8.41667	-8.33333	-8.25	-8.16667	-8.08333	-8	-7.91667	-7.83333	-7.75	-7.66667	-7.58333	-7.5	-7.41667	-7.33333	-7.25	-7.16667	-7.08333	-7	-6.91667	-6.83333	-6.75	-6.66667	-6.58333	-6.5	-6.41667	-6.33333	-6.25	-6.16667	-6.08333	-6	-5.91667	-5.83333	-5.75	-5.66667	-5.58333	-5.5	-5.41667	-5.33333	-5.25	-5.16667	-5.08333	-5	-4.91667	-4.83333	-4.75	-4.66667	-4.58333	-4.5
	n count	1	1	1	1	1	1	1	1	1	1	2	3	4	4	4	4	4	4	5	5	6	6	6	6	6	6	7	7	8	8	8	8	8	8	8	8	9	11	11	11	12	12	12	13	14	14	15	16
Ventral oligodendrocyte cell number	Normalized Frame #	-99	-98	-97	-96	-95	-94	-93	-92	-91	-90	-89	-88	-87	-86	-85	-84	-83	-82	-81	-80	-79	-78	-77	-76	-75	-74	-73	-72	-71	-70	-69	-68	-67	-66	-65	-64	-63	-62	-61	-60	-59	-58	-57	-56	-55	-54	-53	-52
1	Average number of ensheathments																																												1	0	1	3	2
2																															1	1	1	1	0	0	2	3	2	4	3	0	0	1	3	4	4	4	4
3																																						1	2	1	2	0	2	3	3	1	1	2	1
4		0	1	2	2	2	1	2	0	1	1	2	2	0	0	3	2	2	2	5	6	4	3	7	7	7	7	6	5	4	6	4	5	6	6	6	7	8	7	8	8	7	7	6	6	8	8	10	8
5						1	0	1	0	1	2	1	2	3	3	1	0	0	1	1	0	0	0	0	1	1	2	2	2	3	3	2	3	4	4	4	4	3	3	4	4	4	5	5	4	5	5	5	5
6
7																														2	0	0	1	1	3	4	0	2	2	2	1	1	2	1	2	3	2	3	5
8																																						1	1	3	4	1	0	2	2	1	1	1	3
9										1	0	0	0	0	0	2	2	2	2	2	4	4	3	3	3	4	4	4	4	4	4	4	4	4	5	6	6	7	6	5	6	9	9	9	10	11	12	10	11
10																														1	0	2	1	0	1	3	3	3	2	7	6	7	5	9	6	9	5	6	11
11																		1	0	2	4	2	2	3	1	0	1	1	1	1	3	1	0	1	3	3	2	0	3	3	3	1	2	1	1	2	2	2	3
12																																1	0	1	2	2	2	2	2	3	3	4	4	4	3	3	4	4	7
13					1	0	2	4	5	4	3	4	4	3	1	3	2	3	2	4	4	2	4	8	4	4	2	6	6	8	7	5	6	5	4	4	5	5	5	6	5	6	9	4	6	9	12	10	10
14																																																	1
15																																		1	0	0	1	1	0	0	1	3	0	1	2	2	2	1	3
16																																		1	2	2	2	1	1	1	2	0	1	0	0	0	2	3	0
17																																															1	1	0
18
	AVG	0	1	2	1.5	1	1	2.33333	1.66667	1.75	1.5	1.75	2	1.5	1	2.25	1.5	1.6	1.4	2.8	3.6	2.4	2.4	4.2	3.2	3.2	3.2	3.8	3.6	3.28571	3	2.22222	2.33333	2.27273	2.72727	3.09091	3.09091	2.84615	2.76923	3.61538	3.69231	3.30769	3.53846	3.53846	3.5	4.14286	4.13333	4.33333	4.625
	STDEV	#DIV/0!	#DIV/0!	#DIV/0!	0.707107	1	1	1.52753	2.88675	1.5	1.29099	1.70783	1.63299	1.73205	1.41421	0.957427	1	1.14018	0.894427	1.64317	2.19089	1.67332	1.51658	3.27109	2.48998	2.77489	2.38747	2.28035	2.07364	2.42997	2.61861	1.71594	2.23607	2.05382	1.95402	2.0226	2.16585	2.44425	2.04751	2.39925	2.09701	3.11942	3.25616	3.01705	2.68185	3.67648	3.75817	3.26599	3.75722
	Normalized Time (hours)	-8.25	-8.16667	-8.08333	-8	-7.91667	-7.83333	-7.75	-7.66667	-7.58333	-7.5	-7.41667	-7.33333	-7.25	-7.16667	-7.08333	-7	-6.91667	-6.83333	-6.75	-6.66667	-6.58333	-6.5	-6.41667	-6.33333	-6.25	-6.16667	-6.08333	-6	-5.91667	-5.83333	-5.75	-5.66667	-5.58333	-5.5	-5.41667	-5.33333	-5.25	-5.16667	-5.08333	-5	-4.91667	-4.83333	-4.75	-4.66667	-4.58333	-4.5	-4.41667	-4.33333
	n count	1	1	1	2	3	3	3	3	4	4	4	4	4	4	4	4	5	5	5	5	5	5	5	5	5	5	5	5	7	8	9	9	11	11	11	11	13	13	13	13	13	13	13	14	14	15	15	16
[truncated: 180 more columns]

## Sheet: Fig 5C
Dorsal oligodendrocyte cell number	Total Ensheathments	Total ensheathments before peak	% ensheathment attempts before peak
1	98	85	86.7347
2	65	62	95.3846
3	21	19	90.4762
4	89	80	89.8876
5	151	135	89.404
6	75	74	98.6667
7	82	78	95.122
8	90	78	86.6667
9	191	190	99.4764
10	142	132	92.9577
11	136	132	97.0588
12	142	142	100
13	138	138	100
14	80	80	100
15	91	89	97.8022
16	100	99	99
17	117	113	96.5812
18	78	73	93.5897
19	76	76	100
Ventral oligodendrocyte cell number	Total Ensheathments	Total ensheathments before peak	% ensheathment attempts before peak
1	51	50	98.0392
2	56	55	98.2143
3	45	45	100
4	60	60	100
5	24	24	100
6	34	32	94.1176
7	80	77	96.25
8	102	96	94.1176
9	55	55	100
10	174	162	93.1034
11	69	68	98.5507
12	65	65	100
13	158	158	100
14	109	102	93.578
15	70	69	98.5714
16	86	82	95.3488
17	45	44	97.7778
18	89	80	89.8876

## Sheet: Fig 5D
Dorsal oligodendrocyte cell number	Normalized Frame #	-101	-100	-99	-98	-97	-96	-95	-94	-93	-92	-91	-90	-89	-88	-87	-86	-85	-84	-83	-82	-81	-80	-79	-78	-77	-76	-75	-74	-73	-72	-71	-70	-69	-68	-67	-66	-65	-64	-63	-62	-61	-60	-59	-58	-57	-56	-55	-54
1	Average new ensheathment attempts per frame																																												1	0	1	1	1
2
3													4	1	1	0	1	1	1	0	1	0	1	0	0	0	0	0	0	1	1	0	0	0	0	2	0	0	0	0	0	0	0	0	0	0	0	0	0
4																																																1	0
5																																																	1
6
7
8												2	0	0	1	0	0	1	0	0	1	1	0	0	0	1	0	1	0	0	0	0	0	0	1	0	0	0	0	0	1	0	1	0	0	1	2	1	0
9																						1	0	1	0	0	0	0	1	0	1	1	1	2	0	1	0	1	0	1	1	0	0	2	0	2	2	1	0
10																														1	0	0	0	0	0	0	0	2	0	2	1	1	3	1	0	2	0	1	3
11																																							1	1	0	1	0	2	0	5	4	1	3
12														1	0	0	0	0	1	0	0	0	1	0	0	0	2	1	0	0	2	2	1	1	2	1	1	4	0	1	3	1	0	2	3	1	3	0	2
13																				1	1	1	0	1	2	0	0	0	0	0	1	0	2	0	1	1	0	0	0	1	1	1	0	2	2	0	1	1	2
14																												1	1	0	0	1	0	0	0	1	2	1	0	2	1	1	0	0	0	1	1	1	1
15																																							1	0	0	0	0	0	2	0	1	1	1
16																																						1	0	0	1	1	1	0	2	0	1	3	1
17																																										1	0	2	2	2	2	1	1
18																																														1	0	0	0
19			1	0	1	1	1	0	0	0	2	2	2	3	1	2	2	2	2	3	3	3	0	2	2	2	0	2	3	1	2	3	2	1	1	1	3	3	1	0	0	1	0	1	1	1	0	1	0
	AVG	#DIV/0!	1	0	1	1	1	0	0	0	2	2	2	1.25	0.75	0.5	0.75	1	1	0.8	1.2	1	0.333333	0.666667	0.666667	0.5	0.333333	0.714286	0.714286	0.375	0.875	0.875	0.75	0.5	0.625	0.875	0.75	1.33333	0.272727	0.727273	0.818182	0.666667	0.416667	1	1	1.14286	1.28571	0.933333	1
	STDEV	#DIV/0!	#DIV/0!	#DIV/0!	#DIV/0!	#DIV/0!	#DIV/0!	#DIV/0!	#DIV/0!	#DIV/0!	#DIV/0!	0	2	1.25831	0.5	1	0.957427	0.816497	0.816497	1.30384	1.09545	1.09545	0.516398	0.816497	1.0328	0.83666	0.816497	0.755929	1.1127	0.517549	0.834523	1.12599	0.886405	0.755929	0.744024	0.64087	1.16496	1.41421	0.467099	0.786245	0.873863	0.492366	0.900337	0.953463	1.08012	1.35062	1.20439	0.703732	1.0328
	Normalized Time (hours)	-8.41667	-8.33333	-8.25	-8.16667	-8.08333	-8	-7.91667	-7.83333	-7.75	-7.66667	-7.58333	-7.5	-7.41667	-7.33333	-7.25	-7.16667	-7.08333	-7	-6.91667	-6.83333	-6.75	-6.66667	-6.58333	-6.5	-6.41667	-6.33333	-6.25	-6.16667	-6.08333	-6	-5.91667	-5.83333	-5.75	-5.66667	-5.58333	-5.5	-5.41667	-5.33333	-5.25	-5.16667	-5.08333	-5	-4.91667	-4.83333	-4.75	-4.66667	-4.58333	-4.5
Ventral oligodendrocyte cell number	Normalized Frame #	-99	-98	-97	-96	-95	-94	-93	-92	-91	-90	-89	-88	-87	-86	-85	-84	-83	-82	-81	-80	-79	-78	-77	-76	-75	-74	-73	-72	-71	-70	-69	-68	-67	-66	-65	-64	-63	-62	-61	-60	-59	-58	-57	-56	-55	-54	-53	-52
1	Average new ensheathment attempts per frame																																												1	0	1	2	0
2																															1	0	0	1	0	0	2	1	0	2	1	0	0	1	2	1	0	2	0
3																																						1	1	0	2	0	2	1	1	1	0	2	0
4			1	1	0	0	0	2	0	1	0	2	1	0	0	3	0	1	2	3	2	1	0	4	1	1	1	1	0	1	2	1	1	1	1	0	2	2	0	1	1	1	0	1	0	2	0	2	0
5						1	0	1	0	1	1	0	1	2	0	0	0	0	1	0	0	0	0	0	1	0	1	0	0	1	0	0	1	1	0	0	1	0	0	1	0	0	1	0	0	1	0	1	0
6
7																														2	0	0	1	0	3	2	0	2	0	1	0	0	1	0	2	1	0	1	3
8																																						1	1	2	1	0	0	2	2	0	0	0	2
9										1	0	0	0	0	0	2	1	1	0	1	2	0	0	0	0	1	0	0	1	0	1	0	1	0	1	1	1	1	1	0	2	3	2	1	1	2	2	0	2
10																														1	0	2	0	0	1	2	1	1	0	5	1	4	1	4	1	6	1	1	6
11																		1	0	2	2	0	1	2	0	0	1	0	0	0	2	0	0	1	2	0	0	0	3	0	1	0	1	0	1	1	1	0	1
12																																1	0	1	1	0	0	1	1	2	0	1	0	0	0	1	1	1	3
13					1	0	2	2	1	1	1	2	1	2	0	2	1	2	0	2	2	1	4	4	1	1	2	5	3	5	1	1	2	1	2	2	2	1	2	3	1	2	4	0	4	4	3	1	0
14																																																	1
15																																		1	0	0	1	1	0	0	1	2	0	1	1	1	0	0	2
16																																		1	1	0	1	0	0	1	1	0	1	0	0	0	2	2	0
17																																															1	0	0
18
	AVG	#DIV/0!	1	1	0.5	0.333333	0.666667	1.66667	0.333333	1	0.5	1	0.75	1	0	1.75	0.5	1	0.6	1.6	1.6	0.4	1	2	0.6	0.6	1	1.2	0.8	1.42857	0.875	0.555556	0.666667	0.727273	1.09091	0.636364	1	0.923077	0.692308	1.38462	0.923077	1	1	0.846154	1.14286	1.5	0.8	1	1.25
	STDEV	#DIV/0!	#DIV/0!	#DIV/0!	0.707107	0.57735	1.1547	0.57735	0.57735	0	0.57735	1.1547	0.5	1.1547	0	1.25831	0.57735	0.707107	0.894427	1.14018	0.894427	0.547723	1.73205	2	0.547723	0.547723	0.707107	2.16795	1.30384	1.71825	0.834523	0.726483	0.707107	0.467099	0.94388	0.924416	0.774597	0.640513	0.947331	1.44559	0.640513	1.35401	1.1547	1.14354	1.09945	1.6525	0.941124	0.845154	1.69312
	Normalized Time (hours)	-8.25	-8.16667	-8.08333	-8	-7.91667	-7.83333	-7.75	-7.66667	-7.58333	-7.5	-7.41667	-7.33333	-7.25	-7.16667	-7.08333	-7	-6.91667	-6.83333	-6.75	-6.66667	-6.58333	-6.5	-6.41667	-6.33333	-6.25	-6.16667	-6.08333	-6	-5.91667	-5.83333	-5.75	-5.66667	-5.58333	-5.5	-5.41667	-5.33333	-5.25	-5.16667	-5.08333	-5	-4.91667	-4.83333	-4.75	-4.66667	-4.58333	-4.5	-4.41667	-4.33333
[truncated: 180 more columns]

## Sheet: Fig 5E
Dorsal oligodendrocyte cell number	Total ensheathments before peak	Total sheaths lost before peak	% ensheathment attempts lost before peak
1	85	62	72.9412
2	62	43	69.3548
3	19	13	68.4211
4	80	61	76.25
5	135	109	80.7407
6	74	49	66.2162
7	78	49	62.8205
8	78	61	78.2051
9	190	142	74.7368
10	132	106	80.303
11	132	100	75.7576
12	142	117	82.3944
13	138	109	78.9855
14	80	63	78.75
15	89	69	77.5281
16	99	74	74.7475
17	113	90	79.646
18	73	57	78.0822
19	76	54	71.0526
Ventral oligodendrocyte cell number	Total ensheathments before peak	Total sheaths lost before peak	% ensheathment attempts lost before peak
1	50	35	70
2	55	38	69.0909
3	45	33	73.3333
4	60	43	71.6667
5	24	17	70.8333
6	32	20	62.5
7	77	54	70.1299
8	96	77	80.2083
9	55	37	67.2727
10	162	135	83.3333
11	68	52	76.4706
12	65	48	73.8462
13	158	133	84.1772
14	102	80	78.4314
15	69	56	81.1594
16	82	60	73.1707
17	44	30	68.1818
18	80	57	71.25

## Sheet: Fig 5F
Dorsal oligodendrocyte cell number	Normalized Frame #	-101	-100	-99	-98	-97	-96	-95	-94	-93	-92	-91	-90	-89	-88	-87	-86	-85	-84	-83	-82	-81	-80	-79	-78	-77	-76	-75	-74	-73	-72	-71	-70	-69	-68	-67	-66	-65	-64	-63	-62	-61	-60	-59	-58	-57	-56	-55	-54
1	Average ensheathments lost per frame																																												0	0	0	1	2
2
3													0	2	1	2	0	2	1	0	0	0	0	0	1	0	0	0	0	0	1	0	0	1	0	0	0	0	0	0	0	0	0	0	0	0	0	0	0
4																																																0	0
5																																																	0
6
7
8												0	2	0	0	1	0	0	1	0	0	1	1	0	0	0	0	1	0	1	0	0	0	0	0	0	0	0	1	0	0	0	0	2	0	0	1	1	2
9																						0	0	1	0	1	0	0	0	1	0	1	1	0	1	1	2	0	0	1	0	0	1	1	2	0	0	2	0
10																														0	0	0	0	0	1	0	0	0	0	1	2	1	0	2	2	1	1	2	0
11																																							0	0	1	0	0	2	2	0	1	2	3
12														0	1	0	0	0	0	0	1	0	0	1	0	0	0	2	1	0	0	0	4	0	1	1	2	1	2	2	0	1	1	1	3	0	3	4	0
13																				0	0	2	0	1	0	1	1	0	0	0	0	2	0	0	0	0	1	1	0	1	0	1	3	0	1	1	1	1	1
14																												0	1	1	0	0	1	0	0	0	1	1	2	0	2	0	2	0	0	0	1	1	1
15																																							0	0	0	1	0	0	0	1	1	0	1
16																																						0	0	1	0	0	0	1	1	1	1	1	2
17																																										0	1	0	2	1	1	2	2
18																																														0	0	0	0
19			0	0	0	0	1	1	0	1	0	1	0	1	0	2	1	1	3	2	0	3	0	0	3	0	3	4	0	1	2	1	2	0	5	1	2	1	1	0	2	0	0	0	0	0	0	1	0
	AVG	#DIV/0!	0	0	0	0	1	1	0	1	0	0.5	0.666667	0.75	0.5	1.25	0.25	0.75	1.25	0.4	0.2	1	0.166667	0.5	0.666667	0.333333	0.666667	1	0.285714	0.5	0.375	0.5	1	0.125	1	0.375	1	0.444444	0.545455	0.545455	0.636364	0.333333	0.666667	0.75	1	0.357143	0.785714	1.2	0.875
	STDEV	#DIV/0!	#DIV/0!	#DIV/0!	#DIV/0!	#DIV/0!	#DIV/0!	#DIV/0!	#DIV/0!	#DIV/0!	#DIV/0!	0.707107	1.1547	0.957427	0.57735	0.957427	0.5	0.957427	1.25831	0.894427	0.447214	1.26491	0.408248	0.547723	1.21106	0.516398	1.21106	1.52753	0.48795	0.534522	0.744024	0.755929	1.41421	0.353553	1.69031	0.517549	0.92582	0.527046	0.8202	0.687552	0.924416	0.492366	0.984732	0.866025	1.08012	0.497245	0.801784	1.08233	1.0247
	Normalized Time (hours)	-8.41667	-8.33333	-8.25	-8.16667	-8.08333	-8	-7.91667	-7.83333	-7.75	-7.66667	-7.58333	-7.5	-7.41667	-7.33333	-7.25	-7.16667	-7.08333	-7	-6.91667	-6.83333	-6.75	-6.66667	-6.58333	-6.5	-6.41667	-6.33333	-6.25	-6.16667	-6.08333	-6	-5.91667	-5.83333	-5.75	-5.66667	-5.58333	-5.5	-5.41667	-5.33333	-5.25	-5.16667	-5.08333	-5	-4.91667	-4.83333	-4.75	-4.66667	-4.58333	-4.5
Ventral oligodendrocyte cell number	Normalized Frame #	-99	-98	-97	-96	-95	-94	-93	-92	-91	-90	-89	-88	-87	-86	-85	-84	-83	-82	-81	-80	-79	-78	-77	-76	-75	-74	-73	-72	-71	-70	-69	-68	-67	-66	-65	-64	-63	-62	-61	-60	-59	-58	-57	-56	-55	-54	-53	-52
1	Average ensheathments lost per frame																																												0	1	0	0	1
2																															0	0	0	1	1	0	0	0	1	0	2	3	0	0	0	0	0	2	0
3																																						0	0	1	1	2	0	0	1	3	0	1	1
4			0	0	0	0	1	1	1	0	0	1	1	2	0	0	1	1	2	0	1	3	1	0	1	1	1	2	1	2	0	3	0	0	1	0	1	1	1	0	1	2	0	2	0	0	0	0	2
5						0	0	0	1	0	0	1	0	1	0	2	1	0	0	0	1	0	0	0	0	0	0	0	0	0	0	1	0	0	0	0	1	1	0	0	0	0	0	0	1	0	0	1	0
6
7																														0	2	0	0	0	1	1	4	0	0	1	1	0	0	1	1	0	1	0	1
8																																						0	1	0	0	3	1	0	2	1	0	0	0
9										0	1	0	0	0	0	0	1	1	0	1	0	0	1	0	0	0	0	0	1	0	1	0	1	0	0	0	1	0	2	1	1	0	2	1	0	1	1	2	1
10																														0	1	0	1	1	0	0	1	1	1	0	2	3	3	0	4	3	5	0	1
11																		0	1	0	0	2	1	1	2	1	0	0	0	0	0	2	1	0	0	0	1	2	0	0	1	2	0	1	1	0	1	0	0
12																																0	1	0	0	0	0	1	1	1	0	0	0	0	1	1	0	1	0
13					0	1	0	0	0	2	2	1	1	3	2	0	2	1	1	0	2	3	2	0	5	1	4	1	3	3	2	3	1	2	3	2	1	1	2	2	2	1	1	5	2	1	0	3	0
14																																																	0
15																																		0	1	0	0	1	1	0	0	0	3	0	0	1	0	1	0
16																																		0	0	0	1	1	0	1	0	2	0	1	0	0	0	1	3
17																																															0	0	1
18
	AVG	#DIV/0!	0	0	0	0.333333	0.333333	0.333333	0.666667	0.5	0.75	0.75	0.5	1.5	0.5	0.5	1.25	0.6	0.8	0.2	0.8	1.6	1	0.2	1.6	0.6	1	0.6	1	0.714286	0.75	1	0.555556	0.363636	0.636364	0.272727	1	0.692308	0.769231	0.538462	0.846154	1.38462	0.769231	0.846154	0.928571	0.857143	0.533333	0.8	0.6875
	STDEV	#DIV/0!	#DIV/0!	#DIV/0!	0	0.57735	0.57735	0.57735	0.57735	1	0.957427	0.5	0.57735	1.29099	1	1	0.5	0.547723	0.83666	0.447214	0.83666	1.51658	0.707107	0.447214	2.07364	0.547723	1.73205	0.894427	1.22474	1.25357	0.886405	1.32288	0.527046	0.6742	0.924416	0.64667	1.09545	0.630425	0.725011	0.660225	0.800641	1.26085	1.16575	1.40512	1.14114	1.02711	1.30201	0.941124	0.873212
	Normalized Time (hours)	-8.25	-8.16667	-8.08333	-8	-7.91667	-7.83333	-7.75	-7.66667	-7.58333	-7.5	-7.41667	-7.33333	-7.25	-7.16667	-7.08333	-7	-6.91667	-6.83333	-6.75	-6.66667	-6.58333	-6.5	-6.41667	-6.33333	-6.25	-6.16667	-6.08333	-6	-5.91667	-5.83333	-5.75	-5.66667	-5.58333	-5.5	-5.41667	-5.33333	-5.25	-5.16667	-5.08333	-5	-4.91667	-4.83333	-4.75	-4.66667	-4.58333	-4.5	-4.41667	-4.33333
[truncated: 180 more columns]
