# Supplementary material for: Early myelination involves the dynamic and repetitive ensheathment of axons which resolves through a low and consistent stabilization rate
Source: eLife. 2023 Apr 20;12:e82111. doi: 10.7554/eLife.82111 (PMC10198724; doi:10.7554/eLife.82111)
Supplement: Figure 6—figure supplement 1—source data 1. [file elife-82111-fig6-figsupp1-data1.xlsx]

## Sheet: Sheet1
Oligodendrocyte cell number	New sheaths between 3-4dpf	Sheaths lost from 3-4 dpf	Sheath number at 3dpf	Sheath number at 4dpf
1	0	5	10	5
2	0	9	16	7
3	0	5	14	9
4	0	8	22	14
5	0	6	17	11
6	0	6	10	4
7	0	6	18	12
8	0	5	17	12
