# Supplementary material for: Early myelination involves the dynamic and repetitive ensheathment of axons which resolves through a low and consistent stabilization rate
Source: eLife. 2023 Apr 20;12:e82111. doi: 10.7554/eLife.82111 (PMC10198724; doi:10.7554/eLife.82111)
Supplement: Figure 6—source data 1. [file elife-82111-fig6-data1.xlsx]

## Sheet: Control_dorsal
	Fig 6B		Fig 6C	Fig 6D	Fig 6E			Fig 6F	Fig 6G	Fig 6H	Fig 6I
Dorsal oligodendrocyte cell number	Total Ensheathments attempts	Total ensheathments attempts before peak	Peak sheath number	Sheath number at 3dpf	Final sheath number	Final AVG sheath length	Final Total sheath length	Net sheaths lost from Peak to 4dpf	Peak/total ensheathment %	Final/peak ensheathments %	Final/total ensheathments %	3dpf/peak ensheathment %	3dpf sheath number/total attempts %
1	98	85	23	19	13	33.7066	438.186	10	27.0588	56.5217	13.2653	82.6087	19.3878
2	65	62	19	13	11	33.0649	363.714	8	30.6452	57.8947	16.9231	68.4211	20
3	21	19	6	5	5	11.5683	57.8415	1	31.5789	83.3333	23.8095	83.3333	23.8095
4	89	80	19	15	11	35.3314	388.645	8	23.75	57.8947	12.3596	78.9474	16.8539
5	151	135	26	19	15	37.8287	567.431	11	19.2593	57.6923	9.93377	73.0769	12.5828
6	75	74	25	19	16	30.9032	494.451	9	33.7838	64	21.3333	76	25.3333
7	82	78	29	15	12	36.8783	442.54	17	37.1795	41.3793	14.6341	51.7241	18.2927
8	90	78	17	14	10	29.8478	298.478	7	21.7949	58.8235	11.1111	82.3529	15.5556
9	191	190	48	44	24	30.1914	724.593	24	25.2632	50	12.5654	91.6667	23.0366
10	142	132	26	21	18	37.1825	669.285	8	19.697	69.2308	12.6761	80.7692	14.7887
11	136	132	32	19	15	37.6168	564.252	17	24.2424	46.875	11.0294	59.375	13.9706
12	142	142	25	15	14	25.8857	362.4	11	17.6056	56	9.85915	60	10.5634
13	138	138	29	28	17	28.2825	480.803	12	21.0145	58.6207	12.3188	96.5517	20.2899
14	80	80	17	13	12	31.6654	379.985	5	21.25	70.5882	15	76.4706	16.25
15	91	89	20	15	14	35.0856	491.198	6	22.4719	70	15.3846	75	16.4835
16	100	99	25	16	15	34.4948	517.422	10	25.2525	60	15	64	16
17	117	113	23	18	13	41.4514	538.868	10	20.354	56.5217	11.1111	78.2609	15.3846
18	78	73	16	10	8	35.1506	281.205	8	21.9178	50	10.2564	62.5	12.8205
19	76	76	22	14	11	32.4588	357.047	11	28.9474	50	14.4737	63.6364	18.4211
												AVG	AVG
												73.9313	17.3592

## Sheet: Control_ventral
	Fig 6B		Fig 6C	Fig 6D	Fig 6E			Fig 6F	Fig 6G	Fig 6H	Fig 6I
Ventral oligodendrocyte cell number	Total Ensheathments attempts	Total ensheathments attempts before peak	Peak sheath number	Sheath number at 3dpf	Final sheath number	Final AVG sheath length	Final Total sheath length	Net sheaths lost from Peak to 4dpf	Peak/total ensheathment %	Final/peak ensheathments %	Final/total ensheathments %	3dpf/peak ensheathment %	3dpf sheath number/total attempts %
1	51	50	15	11	8	39.9168	319.334	7	30	53.3333	15.6863	73.3333	21.5686
2	56	55	17	15	11	32.6258	358.883	6	30.9091	64.7059	19.6429	88.2353	26.7857
3	45	45	12	9	6	24.146	144.876	6	26.6667	50	13.3333	75	20
4	60	60	17	16	12	22.0677	264.813	5	28.3333	70.5882	20	94.1176	26.6667
5	24	24	7	7	5	37.9747	189.874	2	29.1667	71.4286	20.8333	100	29.1667
6	34	32	12	8	6	32.8721	197.233	6	37.5	50	17.6471	66.6667	23.5294
7	80	77	23	14	12	20.9472	251.366	11	29.8701	52.1739	15	60.8696	17.5
8	102	96	19	16	11	42.0943	463.037	8	19.7917	57.8947	10.7843	84.2105	15.6863
9	55	55	18	12	9	34.4697	310.227	9	32.7273	50	16.3636	66.6667	21.8182
10	174	162	27	22	18	39.1548	704.786	9	16.6667	66.6667	10.3448	81.4815	12.6437
11	69	68	16	13	9	38.064	342.576	7	23.5294	56.25	13.0435	81.25	18.8406
12	65	65	17	13	10	34.6367	346.367	7	26.1538	58.8235	15.3846	76.4706	20
13	158	158	25	22	16	25.6271	410.034	9	15.8228	64	10.1266	88	13.9241
14	109	102	22	15	13	45.6107	592.939	9	21.5686	59.0909	11.9266	68.1818	13.7615
15	70	69	13	9	7	31.0545	217.382	6	18.8406	53.8462	10	69.2308	12.8571
16	86	82	22	15	11	45.1172	496.29	11	26.8293	50	12.7907	68.1818	17.4419
17	45	44	14	11	8	30.9	247.2	6	31.8182	57.1429	17.7778	78.5714	24.4444
18	89	80	23	18	12	25.6304	307.565	11	28.75	52.1739	13.4831	78.2609	20.2247
												AVG	AVG
												77.7071	19.8255
