# Supplementary material for: Early myelination involves the dynamic and repetitive ensheathment of axons which resolves through a low and consistent stabilization rate
Source: eLife. 2023 Apr 20;12:e82111. doi: 10.7554/eLife.82111 (PMC10198724; doi:10.7554/eLife.82111)
Supplement: Figure 7—source data 1. [file elife-82111-fig7-data1.xlsx]

## Sheet: Rab5
Oligodendrocyte cell number	Sheath number	Number of Rab5+ puncta	Sheath length (µm)	Rab5+ puncta/sheath length
1	1	1	3.81	0.262467
2	2	4	7.81	0.512164
	3	2	2.33	0.858369
	4	3	6.13	0.489396
	5	2	5.23	0.382409
	6	2	3.86	0.518135
	7	1	4.82	0.207469
3	8	2	3.82	0.52356
	9	1	3.09	0.323625
	10	2	3.58	0.558659
	11	5	3.86	1.29534
	12	3	3.01	0.996678
4	13	3	7.56	0.396825
5	14	2	6.76	0.295858
	15	3	4.36	0.688073
	16	6	4.73	1.2685
	17	2	7.63	0.262123
	18	2	5.38	0.371747
6	19	3	5.02	0.59761
	20	3	4.37	0.686499
	21	1	3.84	0.260417
	22	3	4.27	0.702576
	23	2	3.64	0.549451
	24	1	3.79	0.263852
	25	3	4.63	0.647948
7	26	4	5.99	0.66778
	27	3	4.75	0.631579
8	28	7	5.33	1.31332
	29	9	9.52	0.945378
	30	4	3.49	1.14613
9	31	4	5.45	0.733945
	32	2	4.6	0.434783
	33	3	5.1	0.588235
	34	4	6.78	0.589971
	35	3	4.09	0.733496
10	36	2	6.19	0.323102

## Sheet: Rab7
Oligodendrocyte cell number	Sheath number	Number of Rab7+ puncta	Sheath length (µm)	Rab7+ puncta/sheath length
1	1	7	7.13	0.981767
	2	3	3.91	0.767263
	3	3	4.18	0.717703
	4	1	6.75	0.148148
2	5	1	3.38	0.295858
	6	0	3.41	0
	7	2	6.54	0.30581
	8	1	6.65	0.150376
	9	4	5.64	0.70922
	10	0	3.98	0
3	11	1	5.03	0.198807
	12	0	5.89	0
	13	1	4.07	0.2457
	14	4	4.79	0.835073
	15	3	4.32	0.694444
4	16	1	6.54	0.152905
	17	1	4.57	0.218818
	18	6	9.34	0.642398
	19	2	5.86	0.341297
	20	0	6.81	0
	21	2	3.49	0.573066
5	22	5	8.48	0.589623
	23	0	5.48	0
6	24	0	3.14	0
7	25	0	4.61	0
8	26	2	3.79	0.527704
9	27	2	6.09	0.328407
	28	0	7.62	0
10	29	5	5.02	0.996016
	30	4	5.72	0.699301
11	31	0	4.14	0
	32	2	4.71	0.424628
	33	0	4.46	0

## Sheet: Rab11
Oligodendrocyte cell number	Sheath number	Number of Rab11+ puncta	Sheath length (µm)	Rab11+ puncta/sheath length
1	1	1	4.17	0.239808
	2	2	4.98	0.401606
	3	0	4.88	0
	4	1	4.21	0.23753
	5	1	4.78	0.209205
	6	3	6.38	0.470219
	7	1	3.38	0.295858
	8	1	3.7	0.27027
	9	2	5.52	0.362319
2	10	0	2.24	0
	11	3	5.3	0.566038
	12	1	1.97	0.507614
	13	2	4.6	0.434783
	14	3	5.06	0.592885
3	15	0	3.15	0
	16	3	3.25	0.923077
4	17	4	5.5	0.727273
	18	1	2.6	0.384615
	19	1	5.61	0.178253
5	20	5	3.6	1.38889
6	21	0	3.79	0
	22	2	4.96	0.403226
7	23	2	4.52	0.442478
	24	2	7.55	0.264901
	25	0	5.29	0
	26	1	3.15	0.31746
8	27	1	4.14	0.241546
	28	2	2.81	0.711744
	29	1	4.14	0.241546
9	30	3	4.91	0.610998
	31	3	4.42	0.678733
	32	0	5.56	0
	33	1	3.5	0.285714
10	34	3	3.11	0.96463
