# Supplementary material for: Early myelination involves the dynamic and repetitive ensheathment of axons which resolves through a low and consistent stabilization rate
Source: eLife. 2023 Apr 20;12:e82111. doi: 10.7554/eLife.82111 (PMC10198724; doi:10.7554/eLife.82111)
Supplement: Figure 8—source data 1. [file elife-82111-fig8-data1.xlsx]

## Sheet: Control ventral
Oligodendrocyte cell number	Sheath number	AVG sheath length (microns)	Total sheath length (microns)
1	17	32.7438	556.644
2	10	36.1281	361.281
3	12	24.1339	289.607
4	13	47.7787	621.123
5	5	39.2088	196.044
6	7	27.7876	194.513
7	9	26.8399	241.559
8	10	33.3204	333.204
9	10	26.0187	260.187
10	18	28.4221	511.599
11	13	18.0326	234.424
12	14	39.4578	552.409
13	9	45.5363	409.827
14	9	31.8707	286.836
15	20	19.9379	398.758
16	7	26.9864	188.905
17	17	29.3688	499.269
18	11	35.9562	395.519
19	5	37.8898	189.449
20	19	40.1316	762.501
21	11	42.2361	464.597
22	5	58.4667	292.334
23	8	30.766	246.128
24	5	33.8375	169.187
25	16	22.5591	360.945
26	10	35.8125	358.125

## Sheet: Rab5WT ventral
Oligodendrocyte cell number	Sheath number	AVG sheath length (microns)	Total sheath length (microns)
1	20	20.5984	411.968
2	9	37.5424	337.882
3	11	38.6383	425.021
4	16	27.483	467.212
5	8	43.9203	351.363
6	11	31.2175	343.393
7	14	33.3827	467.358
8	14	18.166	254.325
9	10	33.5212	335.212
10	17	30.4978	518.463
11	11	37.469	412.159
12	11	33.7462	371.208
13	12	32.0002	384.003
14	21	31.9541	671.037
15	9	36.6754	330.079
16	19	25.433	483.227
17	23	33.5053	770.622
18	20	32.5927	651.854
19	9	33.6004	302.403
20	8	41.3441	330.753
21	9	54.4409	489.968
22	6	27.9921	167.953
23	17	32.2193	547.728
24	14	35.3902	495.462
25	11	41.1908	453.099
26	19	20.0376	380.714
27	4	50.8214	203.285
28	8	30.5378	244.302

## Sheet: rab5DN ventral
Oligodendrocyte cell number	Sheath number	AVG sheath length (microns)	Total sheath length (microns)
1	5	54.7099	273.549
2	12	36.5297	438.356
3	11	44.7596	492.355
4	6	44.6235	267.741
5	11	25.4375	279.812
6	5	36.0417	180.209
7	5	41.8534	209.267
8	14	37.7148	528.007
9	8	39.7022	317.618
10	11	34.1553	375.708
11	6	44.4968	266.981
12	11	34.1281	375.409
13	9	35.5943	320.349
14	6	42.5987	255.592
15	5	35.3034	176.517
16	4	23.7124	94.8498
17	5	30.1717	150.858
18	13	24.9557	324.424
19	6	30.7272	184.363
20	8	26.5004	212.003
21	11	28.706	315.766
22	7	22.8099	159.669
23	5	46.1569	230.785
24	8	34.8622	278.898
25	6	45.7866	274.72
26	6	44.325	265.95
27	3	30.347	91.0411

## Sheet: Rab7WT ventral
Oligodendrocyte cell number	Sheath number	AVG sheath length (microns)	Total sheath length (microns)
1	5	30.0802	150.401
2	15	29.011	464.176
3	9	50.9684	458.715
4	4	44.703	178.812
5	18	30.9348	556.826
6	8	23.2928	186.343
7	11	25.6964	282.66
8	12	22.0426	264.511
9	19	25.2612	479.963
10	14	29.5645	413.903
11	9	36.0212	324.191
12	9	23.1756	208.581
13	17	23.5307	400.022
14	11	31.74	349.14
15	12	22.5344	270.413
16	9	34.2315	308.084
17	11	20.4213	224.634
18	9	26.1376	235.238
19	3	27.64	82.92
20	16	24.8121	396.993
21	8	28.959	231.672
22	8	42.2855	338.284
23	7	37.6747	263.723
24	7	27.5018	192.512
25	6	25.7976	154.786
26	11	27.8688	306.557
27	13	10.9535	142.396
28	8	33.905	271.24
29	12	39.0564	468.677

## Sheet: rab7DN ventral
Oligodendrocyte cell number	Sheath number	AVG sheath length (microns)	Total sheath length (microns)
1	4	32.9546	131.818
2	11	36.6887	403.576
3	15	40.2568	603.852
4	10	22.6875	226.875
5	6	30.1705	181.023
6	8	24.02	192.16
7	8	47.6654	381.323
8	9	45.6379	410.741
9	9	29.3555	264.199
10	11	26.6934	293.627
11	17	35.0573	595.974
12	8	37.0092	296.073
13	14	44.5954	624.335
14	16	30.2117	483.388
15	11	28.6043	314.648
16	13	39.3965	512.155
17	18	21.4936	386.884
18	6	39.7626	238.576
19	14	35.3044	494.262
20	9	19.4259	174.833
21	11	33.0362	363.398
22	8	42.0449	336.359
23	8	38.9958	311.967
24	15	30.0399	450.598
25	22	21.0562	463.236
26	6	26.8854	161.312
27	11	23.3705	257.076
28	5	29.3747	146.874
29	7	39.6367	277.457
30	12	40.6856	488.227
31	13	45.5995	592.793
32	10	45.8884	458.884

## Sheet: Rab11WT ventral
Oligodendrocyte cell number	Sheath number	AVG sheath length (microns)	Total sheath length (microns)
1	18	28.202	507.636
2	6	45.1653	270.992
3	21	19.74	434.28
4	9	38.9556	350.601
5	7	33.7077	235.954
6	11	21.5996	237.596
7	4	47.2716	189.086
8	15	15.1774	227.661
9	10	29.2946	292.946
10	14	28.9624	405.473
11	9	34.3454	309.109
12	6	43.5897	261.538
13	9	32.2025	289.822
14	8	50.4575	403.66
15	6	37.8827	227.296
16	18	22.249	400.482
17	8	21.1612	169.29
18	13	30.0541	390.704
19	11	25.8509	284.36
20	11	36.8389	405.228
21	14	18.4793	258.71
22	7	33.1152	231.806
23	12	27.1492	325.79
24	7	48.0799	336.559
25	7	38.1593	267.115
26	15	34.9458	524.188
27	8	33.8552	270.842
28	8	34.5332	276.266
29	15	20.0792	301.188
30	14	36.1852	506.593

## Sheet: rab11DN ventral
Oligodendrocyte cell number	Sheath number	AVG sheath length (microns)	Total sheath length (microns)
1	9	17.9023	161.12
2	6	42.5938	255.563
3	8	34.5916	276.732
4	4	24.845	99.38
5	9	16.6641	149.977
6	7	44.0911	308.638
7	3	37.7872	113.362
8	4	33.2746	133.098
9	10	24.1363	241.363
10	6	31.6043	189.626
11	7	19.649	137.543
12	11	17.0368	187.405
13	7	51.5565	360.895
14	10	20.6072	206.072
15	9	35.4603	319.143
16	13	25.2388	328.105
17	14	27.5965	386.352
18	9	38.4041	345.637
19	3	47.7609	143.283
20	6	39.8401	239.04
21	9	22.6494	203.844
22	6	43.3168	259.901
23	13	23.135	300.756
24	12	22.5443	270.532
25	4	50.9385	203.754
26	5	34.2543	171.271
27	5	12.5891	62.9455
