# Supplementary material for: Early myelination involves the dynamic and repetitive ensheathment of axons which resolves through a low and consistent stabilization rate
Source: eLife. 2023 Apr 20;12:e82111. doi: 10.7554/eLife.82111 (PMC10198724; doi:10.7554/eLife.82111)
Supplement: Figure 9—figure supplement 1—source data 1. [file elife-82111-fig9-figsupp1-data1.xlsx]

## Sheet: Fig 9.1A
Control Ventral oligodendrocyte cell number	Sheath accumulation time per cell (hours)
1	4.67
2	5.83333
3	5.25
4	8.17
5	7.92
6	3.42
7	5.92
8	5.25
9	7.58
10	5.92
11	6.92
12	5.75
13	8
14	4.33333
15	5.58333
16	5.58333
17	4.5
18	4.16667
Rab5WT Ventral oligodendrocyte cell number	Sheath accumulation time per cell (hours)
1	7.08
2	6.67
3	4.5
4	6
5	5
6	6.33
7	5.5
8	5
9	6.25
10	5
11	4.91667
12	5.33333
13	4.58333
14	3.5
15	3.41667
16	6.91667
17	8.25
18	5
rab5DN ventral oligodendrocyte cell number	Sheath accumulation time per cell (hours)
1	3.17
2	9.92
3	5.33333
4	4
5	7
6	4.5
7	2.42
8	3.17
9	4.58
10	3.08333
11	5.66667
12	6.08333
13	4.5
14	6.25
15	5.5
16	9.83333
17	7.08333
18	4.91667

## Sheet: Fig 9.1B
Control ventral oligodendrocyte cell number	Normalized Frame #	-99	-98	-97	-96	-95	-94	-93	-92	-91	-90	-89	-88	-87	-86	-85	-84	-83	-82	-81	-80	-79	-78	-77	-76	-75	-74	-73	-72	-71	-70	-69	-68	-67	-66	-65	-64	-63	-62	-61	-60	-59	-58	-57	-56	-55	-54	-53	-52
1	Average number of ensheathments																																												1	0	1	3	2
2																															1	1	1	1	0	0	2	3	2	4	3	0	0	1	3	4	4	4	4
3																																						1	2	1	2	0	2	3	3	1	1	2	1
4		0	1	2	2	2	1	2	0	1	1	2	2	0	0	3	2	2	2	5	6	4	3	7	7	7	7	6	5	4	6	4	5	6	6	6	7	8	7	8	8	7	7	6	6	8	8	10	8
5						1	0	1	0	1	2	1	2	3	3	1	0	0	1	1	0	0	0	0	1	1	2	2	2	3	3	2	3	4	4	4	4	3	3	4	4	4	5	5	4	5	5	5	5
6
7																														2	0	0	1	1	3	4	0	2	2	2	1	1	2	1	2	3	2	3	5
8																																						1	1	3	4	1	0	2	2	1	1	1	3
9										1	0	0	0	0	0	2	2	2	2	2	4	4	3	3	3	4	4	4	4	4	4	4	4	4	5	6	6	7	6	5	6	9	9	9	10	11	12	10	11
10																														1	0	2	1	0	1	3	3	3	2	7	6	7	5	9	6	9	5	6	11
11																		1	0	2	4	2	2	3	1	0	1	1	1	1	3	1	0	1	3	3	2	0	3	3	3	1	2	1	1	2	2	2	3
12																																1	0	1	2	2	2	2	2	3	3	4	4	4	3	3	4	4	7
13					1	0	2	4	5	4	3	4	4	3	1	3	2	3	2	4	4	2	4	8	4	4	2	6	6	8	7	5	6	5	4	4	5	5	5	6	5	6	9	4	6	9	12	10	10
14																																																	1
15																																		1	0	0	1	1	0	0	1	3	0	1	2	2	2	1	3
16																																		1	2	2	2	1	1	1	2	0	1	0	0	0	2	3	0
17																																															1	1	0
18
	AVG	0	1	2	1.5	1	1	2.33333	1.66667	1.75	1.5	1.75	2	1.5	1	2.25	1.5	1.6	1.4	2.8	3.6	2.4	2.4	4.2	3.2	3.2	3.2	3.8	3.6	3.28571	3	2.22222	2.33333	2.27273	2.72727	3.09091	3.09091	2.84615	2.76923	3.61538	3.69231	3.30769	3.53846	3.53846	3.5	4.14286	4.13333	4.33333	4.625
	STDEV	#DIV/0!	#DIV/0!	#DIV/0!	0.707107	1	1	1.52753	2.88675	1.5	1.29099	1.70783	1.63299	1.73205	1.41421	0.957427	1	1.14018	0.894427	1.64317	2.19089	1.67332	1.51658	3.27109	2.48998	2.77489	2.38747	2.28035	2.07364	2.42997	2.61861	1.71594	2.23607	2.05382	1.95402	2.0226	2.16585	2.44425	2.04751	2.39925	2.09701	3.11942	3.25616	3.01705	2.68185	3.67648	3.75817	3.26599	3.75722
	Normalized Time (hours)	-8.25	-8.16667	-8.08333	-8	-7.91667	-7.83333	-7.75	-7.66667	-7.58333	-7.5	-7.41667	-7.33333	-7.25	-7.16667	-7.08333	-7	-6.91667	-6.83333	-6.75	-6.66667	-6.58333	-6.5	-6.41667	-6.33333	-6.25	-6.16667	-6.08333	-6	-5.91667	-5.83333	-5.75	-5.66667	-5.58333	-5.5	-5.41667	-5.33333	-5.25	-5.16667	-5.08333	-5	-4.91667	-4.83333	-4.75	-4.66667	-4.58333	-4.5	-4.41667	-4.33333
	n count	1	1	1	2	3	3	3	3	4	4	4	4	4	4	4	4	5	5	5	5	5	5	5	5	5	5	5	5	7	8	9	9	11	11	11	11	13	13	13	13	13	13	13	14	14	15	15	16
Rab5WT ventral oligodendrocyte cell number	Normalized Frame #	-99	-99	-98	-97	-96	-95	-94	-93	-92	-91	-90	-89	-88	-87	-86	-85	-84	-83	-82	-81	-80	-79	-78	-77	-76	-75	-74	-73	-72	-71	-70	-69	-68	-67	-66	-65	-64	-63	-62	-61	-60	-59	-58	-57	-56	-55	-54	-53
1	Average number of ensheathments																1	1	0	2	2	1	0	0	2	3	3	2	2	2	7	4	5	4	4	4	3	6	6	6	6	6	5	8	6	7	7	7	7
2																						1	1	1	1	1	2	1	1	3	2	2	2	4	2	3	2	3	5	4	6	4	3	4	3	3	2	4	5
3																																																1	0
4																														1	0	0	0	1	0	0	1	1	1	2	2	2	1	3	4	4	5	5	5
5																																										2	1	0	0	1	3	2	2
6																										1	2	2	0	1	1	1	0	0	0	2	2	1	3	1	2	3	2	1	3	5	4	5	5
7																																				1	1	2	0	1	0	0	0	3	2	1	2	2	1
8																																										1	0	0	1	0	1	1	3
9																											1	1	0	0	1	1	0	1	1	0	0	2	2	2	3	1	2	2	4	4	4	6	9
10																																										2	2	1	0	0	0	1	3
11																																											1	2	0	0	1	0	1
12																																						1	0	1	1	0	0	2	2	2	4	6	9
13																																															1	1	1
14
15
16																			1	1	0	0	0	0	0	1	0	1	0	0	0	0	1	0	0	0	0	1	1	1	2	1	0	2	2	1	1	1	2
17		0	1	0	0	2	1	0	1	0	1	1	1	1	1	0	2	2	3	3	0	0	0	1	2	1	2	2	1	3	0	0	1	1	1	0	0	1	2	1	0	0	2	2	3	2	1	4	6
18																																										1	3	2	3	2	1	3	4
	AVG	0	1	0	0	2	1	0	1	0	1	1	1	1	1	0	1.5	1.5	1.33333	2	0.666667	0.5	0.25	0.5	1.25	1.4	1.66667	1.5	0.666667	1.42857	1.57143	1.14286	1.28571	1.57143	1.14286	1.25	1.125	2	2.22222	2.11111	2.44444	1.76923	1.57143	2.28571	2.35714	2.28571	2.46667	3.0625	3.9375
	STDEV	#DIV/0!	#DIV/0!	#DIV/0!	#DIV/0!	#DIV/0!	#DIV/0!	#DIV/0!	#DIV/0!	#DIV/0!	#DIV/0!	#DIV/0!	#DIV/0!	#DIV/0!	#DIV/0!	#DIV/0!	0.707107	0.707107	1.52753	1	1.1547	0.57735	0.5	0.57735	0.957427	0.894427	1.0328	0.547723	0.816497	1.27242	2.50713	1.46385	1.79947	1.71825	1.46385	1.58114	1.12599	1.65831	2.10819	1.76383	2.24227	1.73944	1.45255	1.9779	1.7368	2.09132	1.95911	2.23514	2.81588
	Normalized Time (hours)	-8.25	-8.25	-8.16667	-8.08333	-8	-7.91667	-7.83333	-7.75	-7.66667	-7.58333	-7.5	-7.41667	-7.33333	-7.25	-7.16667	-7.08333	-7	-6.91667	-6.83333	-6.75	-6.66667	-6.58333	-6.5	-6.41667	-6.33333	-6.25	-6.16667	-6.08333	-6	-5.91667	-5.83333	-5.75	-5.66667	-5.58333	-5.5	-5.41667	-5.33333	-5.25	-5.16667	-5.08333	-5	-4.91667	-4.83333	-4.75	-4.66667	-4.58333	-4.5	-4.41667
	n count	1	1	1	1	1	1	1	1	1	1	1	1	1	1	1	2	2	3	3	3	4	4	4	4	5	6	6	6	7	7	7	7	7	7	8	8	9	9	9	9	13	14	14	14	14	15	16	16
rab5DN ventral oligodendrocyte cell number	Normalized Frame #	-121	-120	-119	-118	-117	-116	-115	-114	-113	-112	-111	-110	-109	-108	-107	-106	-105	-104	-103	-102	-101	-100	-99	-98	-97	-96	-95	-94	-93	-92	-91	-90	-89	-88	-87	-86	-85	-84	-83	-82	-81	-80	-79	-78	-77	-76	-75	-74
1	Average number of ensheathments
2			0	1	0	0	0	1	1	0	0	0	1	0	0	0	0	0	1	1	1	1	1	1	0	0	1	0	0	0	1	0	0	0	0	0	1	1	0	0	1	1	2	0	1	3	3	3	1
3
4
5																																							1	1	2	2	2	1	2	2	3	4	3
6
7
8
9
10
11
12
13
14																																																3	2
15
16					1	0	0	2	2	0	1	0	0	1	2	2	1	2	1	1	3	2	1	1	0	1	1	1	2	1	2	1	1	4	2	2	2	3	3	1	1	1	1	1	1	2	2	3	2
17																																						1	1	1	0	0	0	1	0	0	0	0	0
18
	AVG	#DIV/0!	0	1	0.5	0	0	1.5	1.5	0	0.5	0	0.5	0.5	1	1	0.5	1	1	1	2	1.5	1	1	0	0.5	1	0.5	1	0.5	1.5	0.5	0.5	2	1	1	1.5	1.66667	1.25	0.75	1	1	1.25	0.75	1	1.75	2	2.6	1.6
	STDEV	#DIV/0!	#DIV/0!	#DIV/0!	0.707107	0	0	0.707107	0.707107	0	0.707107	0	0.707107	0.707107	1.41421	1.41421	0.707107	1.41421	0	0	1.41421	0.707107	0	0	0	0.707107	0	0.707107	1.41421	0.707107	0.707107	0.707107	0.707107	2.82843	1.41421	1.41421	0.707107	1.1547	1.25831	0.5	0.816497	0.816497	0.957427	0.5	0.816497	1.25831	1.41421	1.51658	1.14018
	Normalized Time (hours)	-10.0833	-10	-9.91667	-9.83333	-9.75	-9.66667	-9.58333	-9.5	-9.41667	-9.33333	-9.25	-9.16667	-9.08333	-9	-8.91667	-8.83333	-8.75	-8.66667	-8.58333	-8.5	-8.41667	-8.33333	-8.25	-8.16667	-8.08333	-8	-7.91667	-7.83333	-7.75	-7.66667	-7.58333	-7.5	-7.41667	-7.33333	-7.25	-7.16667	-7.08333	-7	-6.91667	-6.83333	-6.75	-6.66667	-6.58333	-6.5	-6.41667	-6.33333	-6.25	-6.16667
	n count	0	1	1	2	2	2	2	2	2	2	2	2	2	2	2	2	2	2	2	2	2	2	2	2	2	2	2	2	2	2	2	2	2	2	2	2	3	4	4	4	4	4	4	4	4	4	5	5
[truncated: 227 more columns]

## Sheet: Fig 9.1C
Control Ventral oligodendrocyte cell number	Total Ensheathments	Total ensheathments before peak	% ensheathment attempts before peak
1	51	50	98.0392
2	56	55	98.2143
3	45	45	100
4	60	60	100
5	24	24	100
6	34	32	94.1176
7	80	77	96.25
8	102	96	94.1176
9	55	55	100
10	174	162	93.1034
11	69	68	98.5507
12	65	65	100
13	158	158	100
14	109	102	93.578
15	70	69	98.5714
16	86	82	95.3488
17	45	44	97.7778
18	89	80	89.8876
Rab5WT Ventral oligodendrocyte cell number	Total Ensheathments	Total ensheathments before peak	% ensheathment attempts before peak
1	46	46	100
2	53	53	100
3	68	57	83.8235
4	81	81	100
5	71	63	88.7324
6	138	133	96.3768
7	99	92	92.9293
8	71	65	91.5493
9	55	55	100
10	70	64	91.4286
11	94	91	96.8085
12	141	140	99.2908
13	43	39	90.6977
14	74	72	97.2973
15	89	81	91.0112
16	66	66	100
17	133	132	99.2481
18	72	70	97.2222
rab5DN ventral oligodendrocyte cell number	Total Ensheathments	Total ensheathments before peak	% ensheathment attempts before peak
1	22	21	95.4545
2	67	66	98.5075
3	27	21	77.7778
4	52	51	98.0769
5	67	65	97.0149
6	62	60	96.7742
7	73	65	89.0411
8	48	43	89.5833
9	69	68	98.5507
10	49	44	89.7959
11	60	60	100
12	165	161	97.5758
13	72	72	100
14	104	103	99.0385
15	76	72	94.7368
16	92	88	95.6522
17	125	121	96.8
18	154	141	91.5584

## Sheet: Fig 9.1D
Control ventral oligodendrocyte cell number	Normalized Frame #	-99	-98	-97	-96	-95	-94	-93	-92	-91	-90	-89	-88	-87	-86	-85	-84	-83	-82	-81	-80	-79	-78	-77	-76	-75	-74	-73	-72	-71	-70	-69	-68	-67	-66	-65	-64	-63	-62	-61	-60	-59	-58	-57	-56	-55	-54	-53	-52
1	Average new ensheathment attempts per frame																																												1	0	1	2	0
2																															1	0	0	1	0	0	2	1	0	2	1	0	0	1	2	1	0	2	0
3																																						1	1	0	2	0	2	1	1	1	0	2	0
4			1	1	0	0	0	2	0	1	0	2	1	0	0	3	0	1	2	3	2	1	0	4	1	1	1	1	0	1	2	1	1	1	1	0	2	2	0	1	1	1	0	1	0	2	0	2	0
5						1	0	1	0	1	1	0	1	2	0	0	0	0	1	0	0	0	0	0	1	0	1	0	0	1	0	0	1	1	0	0	1	0	0	1	0	0	1	0	0	1	0	1	0
6
7																														2	0	0	1	0	3	2	0	2	0	1	0	0	1	0	2	1	0	1	3
8																																						1	1	2	1	0	0	2	2	0	0	0	2
9										1	0	0	0	0	0	2	1	1	0	1	2	0	0	0	0	1	0	0	1	0	1	0	1	0	1	1	1	1	1	0	2	3	2	1	1	2	2	0	2
10																														1	0	2	0	0	1	2	1	1	0	5	1	4	1	4	1	6	1	1	6
11																		1	0	2	2	0	1	2	0	0	1	0	0	0	2	0	0	1	2	0	0	0	3	0	1	0	1	0	1	1	1	0	1
12																																1	0	1	1	0	0	1	1	2	0	1	0	0	0	1	1	1	3
13					1	0	2	2	1	1	1	2	1	2	0	2	1	2	0	2	2	1	4	4	1	1	2	5	3	5	1	1	2	1	2	2	2	1	2	3	1	2	4	0	4	4	3	1	0
14																																																	1
15																																		1	0	0	1	1	0	0	1	2	0	1	1	1	0	0	2
16																																		1	1	0	1	0	0	1	1	0	1	0	0	0	2	2	0
17																																															1	0	0
18
	AVG	#DIV/0!	1	1	0.5	0.333333	0.666667	1.66667	0.333333	1	0.5	1	0.75	1	0	1.75	0.5	1	0.6	1.6	1.6	0.4	1	2	0.6	0.6	1	1.2	0.8	1.42857	0.875	0.555556	0.666667	0.727273	1.09091	0.636364	1	0.923077	0.692308	1.38462	0.923077	1	1	0.846154	1.14286	1.5	0.8	1	1.25
	STDEV	#DIV/0!	#DIV/0!	#DIV/0!	0.707107	0.57735	1.1547	0.57735	0.57735	0	0.57735	1.1547	0.5	1.1547	0	1.25831	0.57735	0.707107	0.894427	1.14018	0.894427	0.547723	1.73205	2	0.547723	0.547723	0.707107	2.16795	1.30384	1.71825	0.834523	0.726483	0.707107	0.467099	0.94388	0.924416	0.774597	0.640513	0.947331	1.44559	0.640513	1.35401	1.1547	1.14354	1.09945	1.6525	0.941124	0.845154	1.69312
	Normalized Time (hours)	-8.25	-8.16667	-8.08333	-8	-7.91667	-7.83333	-7.75	-7.66667	-7.58333	-7.5	-7.41667	-7.33333	-7.25	-7.16667	-7.08333	-7	-6.91667	-6.83333	-6.75	-6.66667	-6.58333	-6.5	-6.41667	-6.33333	-6.25	-6.16667	-6.08333	-6	-5.91667	-5.83333	-5.75	-5.66667	-5.58333	-5.5	-5.41667	-5.33333	-5.25	-5.16667	-5.08333	-5	-4.91667	-4.83333	-4.75	-4.66667	-4.58333	-4.5	-4.41667	-4.33333
Rab5WT ventral oligodendrocyte cell number	Normalized Frame #	-99	-99	-98	-97	-96	-95	-94	-93	-92	-91	-90	-89	-88	-87	-86	-85	-84	-83	-82	-81	-80	-79	-78	-77	-76	-75	-74	-73	-72	-71	-70	-69	-68	-67	-66	-65	-64	-63	-62	-61	-60	-59	-58	-57	-56	-55	-54	-53
1	Average new ensheathment attempts per frame																1	0	0	2	0	1	0	0	2	1	0	0	0	0	6	0	3	1	0	0	0	3	1	1	0	1	1	3	1	1	0	0	1
2																						1	0	0	0	0	1	0	0	2	0	0	1	2	0	1	0	1	2	1	2	0	0	1	0	0	0	2	2
3																																																1	0
4																														1	0	0	0	1	0	0	1	1	0	1	0	0	0	2	2	0	2	0	0
5																																										2	0	0	0	1	2	0	1
6																										1	1	2	0	1	0	0	0	0	0	2	2	0	2	1	1	2	0	0	2	3	1	1	1
7																																				1	1	1	0	1	0	0	0	3	1	1	2	1	0
8																																										1	0	0	1	0	1	1	2
9																											1	0	0	0	1	0	0	1	0	0	0	2	0	1	1	0	2	0	2	0	1	2	3
10																																										2	0	1	0	0	0	1	2
11																																											1	2	0	0	1	0	1
12																																						1	0	1	1	0	0	2	0	1	3	4	3
13																																															1	0	0
14
15
16																			1	0	0	0	0	0	0	1	0	1	0	0	0	0	1	0	0	0	0	1	0	0	1	0	0	2	1	1	0	0	2
17			1	0	0	2	0	0	1	0	1	0	1	1	0	0	2	1	1	1	0	0	0	1	1	1	2	0	1	2	0	0	1	1	0	0	0	1	1	1	0	0	2	1	2	0	0	4	2
18																																										1	3	1	1	0	0	2	1
	AVG	#DIV/0!	1	0	0	2	0	0	1	0	1	0	1	1	0	0	1.5	0.5	0.666667	1	0	0.5	0	0.25	0.75	0.8	0.833333	0.5	0.166667	0.857143	1	0	0.857143	0.857143	0	0.5	0.5	1.22222	0.666667	0.888889	0.666667	0.692308	0.642857	1.28571	0.928571	0.571429	0.933333	1.1875	1.3125
	STDEV	#DIV/0!	#DIV/0!	#DIV/0!	#DIV/0!	#DIV/0!	#DIV/0!	#DIV/0!	#DIV/0!	#DIV/0!	#DIV/0!	#DIV/0!	#DIV/0!	#DIV/0!	#DIV/0!	#DIV/0!	0.707107	0.707107	0.57735	1	0	0.57735	0	0.5	0.957427	0.447214	0.752773	0.83666	0.408248	0.899735	2.23607	0	1.06904	0.690066	0	0.755929	0.755929	0.833333	0.866025	0.333333	0.707107	0.85485	1.00821	1.06904	0.828742	0.851631	0.96115	1.32759	1.01448
	Normalized Time (hours)	-8.25	-8.25	-8.16667	-8.08333	-8	-7.91667	-7.83333	-7.75	-7.66667	-7.58333	-7.5	-7.41667	-7.33333	-7.25	-7.16667	-7.08333	-7	-6.91667	-6.83333	-6.75	-6.66667	-6.58333	-6.5	-6.41667	-6.33333	-6.25	-6.16667	-6.08333	-6	-5.91667	-5.83333	-5.75	-5.66667	-5.58333	-5.5	-5.41667	-5.33333	-5.25	-5.16667	-5.08333	-5	-4.91667	-4.83333	-4.75	-4.66667	-4.58333	-4.5	-4.41667
rab5DN ventral oligodendrocyte cell number	Normalized Frame #	-121	-120	-119	-118	-117	-116	-115	-114	-113	-112	-111	-110	-109	-108	-107	-106	-105	-104	-103	-102	-101	-100	-99	-98	-97	-96	-95	-94	-93	-92	-91	-90	-89	-88	-87	-86	-85	-84	-83	-82	-81	-80	-79	-78	-77	-76	-75	-74
1	Average new ensheathment attempts per frame
2				1	0	0	0	1	1	0	0	0	1	0	0	0	0	0	1	0	0	0	0	0	0	0	1	0	0	0	1	0	0	0	0	0	1	0	0	0	1	1	1	0	1	2	1	0	0
3
4
5																																							1	0	2	1	1	1	1	0	1	1	0
6
7
8
9
10
11
12
13
14																																																3	0
15
16					1	0	0	2	0	0	1	0	0	1	1	1	1	1	0	1	2	1	0	0	0	1	0	0	1	0	1	1	1	3	0	2	1	1	0	0	1	1	1	0	0	1	1	2	0
17																																						1	1	1	0	0	0	1	0	0	0	0	0
18
	AVG	#DIV/0!	#DIV/0!	1	0.5	0	0	1.5	0.5	0	0.5	0	0.5	0.5	0.5	0.5	0.5	0.5	0.5	0.5	1	0.5	0	0	0	0.5	0.5	0	0.5	0	1	0.5	0.5	1.5	0	1	1	0.666667	0.5	0.25	1	0.75	0.75	0.5	0.5	0.75	0.75	1.2	0
	STDEV	#DIV/0!	#DIV/0!	#DIV/0!	0.707107	0	0	0.707107	0.707107	0	0.707107	0	0.707107	0.707107	0.707107	0.707107	0.707107	0.707107	0.707107	0.707107	1.41421	0.707107	0	0	0	0.707107	0.707107	0	0.707107	0	0	0.707107	0.707107	2.12132	0	1.41421	0	0.57735	0.57735	0.5	0.816497	0.5	0.5	0.57735	0.57735	0.957427	0.5	1.30384	0
	Normalized Time (hours)	-10.0833	-10	-9.91667	-9.83333	-9.75	-9.66667	-9.58333	-9.5	-9.41667	-9.33333	-9.25	-9.16667	-9.08333	-9	-8.91667	-8.83333	-8.75	-8.66667	-8.58333	-8.5	-8.41667	-8.33333	-8.25	-8.16667	-8.08333	-8	-7.91667	-7.83333	-7.75	-7.66667	-7.58333	-7.5	-7.41667	-7.33333	-7.25	-7.16667	-7.08333	-7	-6.91667	-6.83333	-6.75	-6.66667	-6.58333	-6.5	-6.41667	-6.33333	-6.25	-6.16667
[truncated: 227 more columns]

## Sheet: Fig 9.1E
Control Ventral oligodendrocyte cell number	Total ensheathments before peak	Total sheaths lost before peak	% ensheathment attempts lost before peak
1	50	35	70
2	55	38	69.0909
3	45	33	73.3333
4	60	43	71.6667
5	24	17	70.8333
6	32	20	62.5
7	77	54	70.1299
8	96	77	80.2083
9	55	37	67.2727
10	162	135	83.3333
11	68	52	76.4706
12	65	48	73.8462
13	158	133	84.1772
14	102	80	78.4314
15	69	56	81.1594
16	82	60	73.1707
17	44	30	68.1818
18	80	57	71.25
Rab5WT Ventral oligodendrocyte cell number	Total ensheathments before peak	Total sheaths lost before peak	% ensheathment attempts lost before peak
1	46	31	67.3913
2	53	41	77.3585
3	57	38	66.6667
4	81	61	75.3086
5	63	47	74.6032
6	133	105	78.9474
7	92	77	83.6957
8	65	50	76.9231
9	55	41	74.5455
10	64	51	79.6875
11	91	74	81.3187
12	140	108	77.1429
13	39	27	69.2308
14	72	50	69.4444
15	81	65	80.2469
16	66	49	74.2424
17	132	107	81.0606
18	70	53	75.7143
rab5DN ventral oligodendrocyte cell number	Total ensheathments before peak	Total sheaths lost before peak	% ensheathment attempts lost before peak
1	21	11	52.381
2	66	53	80.303
3	21	14	66.6667
4	51	31	60.7843
5	65	49	75.3846
6	60	44	73.3333
7	65	46	70.7692
8	43	24	55.814
9	68	49	72.0588
10	44	32	72.7273
11	60	44	73.3333
12	161	132	81.9876
13	72	52	72.2222
14	103	83	80.5825
15	72	55	76.3889
16	88	74	84.0909
17	121	98	80.9917
18	141	114	80.8511

## Sheet: Fig 9.1F
Control ventral oligodendrocyte cell number	Normalized Frame #	-99	-98	-97	-96	-95	-94	-93	-92	-91	-90	-89	-88	-87	-86	-85	-84	-83	-82	-81	-80	-79	-78	-77	-76	-75	-74	-73	-72	-71	-70	-69	-68	-67	-66	-65	-64	-63	-62	-61	-60	-59	-58	-57	-56	-55	-54	-53	-52
1	Average ensheathments lost per frame																																												0	1	0	0	1
2																															0	0	0	1	1	0	0	0	1	0	2	3	0	0	0	0	0	2	0
3																																						0	0	1	1	2	0	0	1	3	0	1	1
4			0	0	0	0	1	1	1	0	0	1	1	2	0	0	1	1	2	0	1	3	1	0	1	1	1	2	1	2	0	3	0	0	1	0	1	1	1	0	1	2	0	2	0	0	0	0	2
5						0	0	0	1	0	0	1	0	1	0	2	1	0	0	0	1	0	0	0	0	0	0	0	0	0	0	1	0	0	0	0	1	1	0	0	0	0	0	0	1	0	0	1	0
6
7																														0	2	0	0	0	1	1	4	0	0	1	1	0	0	1	1	0	1	0	1
8																																						0	1	0	0	3	1	0	2	1	0	0	0
9										0	1	0	0	0	0	0	1	1	0	1	0	0	1	0	0	0	0	0	1	0	1	0	1	0	0	0	1	0	2	1	1	0	2	1	0	1	1	2	1
10																														0	1	0	1	1	0	0	1	1	1	0	2	3	3	0	4	3	5	0	1
11																		0	1	0	0	2	1	1	2	1	0	0	0	0	0	2	1	0	0	0	1	2	0	0	1	2	0	1	1	0	1	0	0
12																																0	1	0	0	0	0	1	1	1	0	0	0	0	1	1	0	1	0
13					0	1	0	0	0	2	2	1	1	3	2	0	2	1	1	0	2	3	2	0	5	1	4	1	3	3	2	3	1	2	3	2	1	1	2	2	2	1	1	5	2	1	0	3	0
14																																																	0
15																																		0	1	0	0	1	1	0	0	0	3	0	0	1	0	1	0
16																																		0	0	0	1	1	0	1	0	2	0	1	0	0	0	1	3
17																																															0	0	1
18
	AVG	#DIV/0!	0	0	0	0.333333	0.333333	0.333333	0.666667	0.5	0.75	0.75	0.5	1.5	0.5	0.5	1.25	0.6	0.8	0.2	0.8	1.6	1	0.2	1.6	0.6	1	0.6	1	0.714286	0.75	1	0.555556	0.363636	0.636364	0.272727	1	0.692308	0.769231	0.538462	0.846154	1.38462	0.769231	0.846154	0.928571	0.857143	0.533333	0.8	0.6875
	STDEV	#DIV/0!	#DIV/0!	#DIV/0!	0	0.57735	0.57735	0.57735	0.57735	1	0.957427	0.5	0.57735	1.29099	1	1	0.5	0.547723	0.83666	0.447214	0.83666	1.51658	0.707107	0.447214	2.07364	0.547723	1.73205	0.894427	1.22474	1.25357	0.886405	1.32288	0.527046	0.6742	0.924416	0.64667	1.09545	0.630425	0.725011	0.660225	0.800641	1.26085	1.16575	1.40512	1.14114	1.02711	1.30201	0.941124	0.873212
	Normalized Time (hours)	-8.25	-8.16667	-8.08333	-8	-7.91667	-7.83333	-7.75	-7.66667	-7.58333	-7.5	-7.41667	-7.33333	-7.25	-7.16667	-7.08333	-7	-6.91667	-6.83333	-6.75	-6.66667	-6.58333	-6.5	-6.41667	-6.33333	-6.25	-6.16667	-6.08333	-6	-5.91667	-5.83333	-5.75	-5.66667	-5.58333	-5.5	-5.41667	-5.33333	-5.25	-5.16667	-5.08333	-5	-4.91667	-4.83333	-4.75	-4.66667	-4.58333	-4.5	-4.41667	-4.33333
Rab5WT ventral oligodendrocyte cell number	Normalized Frame #	-99	-99	-98	-97	-96	-95	-94	-93	-92	-91	-90	-89	-88	-87	-86	-85	-84	-83	-82	-81	-80	-79	-78	-77	-76	-75	-74	-73	-72	-71	-70	-69	-68	-67	-66	-65	-64	-63	-62	-61	-60	-59	-58	-57	-56	-55	-54	-53
1	Average ensheathments lost per frame																0	0	1	0	0	2	1	0	0	0	0	1	0	0	1	3	2	2	0	0	1	0	1	1	0	1	2	0	3	0	0	0	1
2																						0	0	0	0	0	0	1	0	0	1	0	1	0	2	0	1	0	0	2	0	2	1	0	1	0	1	0	1
3																																																0	1
4																														0	1	0	0	0	1	0	0	1	0	0	0	0	1	0	1	0	1	0	0
5																																										0	1	1	0	0	0	1	1
6																										0	0	2	2	0	0	0	1	0	0	0	2	1	0	3	0	1	1	1	0	1	2	0	1
7																																				0	1	0	2	0	1	0	0	0	2	2	1	1	1
8																																										0	1	0	0	1	0	1	0
9																											0	0	1	0	0	0	1	0	0	1	0	0	0	1	0	2	1	0	0	0	1	0	0
10																																										0	0	2	1	0	0	0	0
11																																											0	1	2	0	0	1	0
12																																						0	1	0	1	1	0	0	0	1	1	2	0
13																																															0	0	0
14
15
16																			0	0	1	0	0	0	0	0	1	0	1	0	0	0	0	1	0	0	0	0	0	0	0	1	1	0	1	2	0	0	1
17			0	1	0	0	1	1	0	1	0	0	1	1	0	1	0	1	0	1	3	0	0	0	0	2	1	0	2	0	3	0	0	1	0	1	0	0	0	2	1	0	0	1	1	1	1	1	0
18																																										0	1	2	0	1	1	0	0
	AVG	#DIV/0!	0	1	0	0	1	1	0	1	0	0	1	1	0	1	0	0.5	0.333333	0.333333	1.33333	0.5	0.25	0	0	0.4	0.333333	0.666667	1	0	0.857143	0.428571	0.714286	0.571429	0.428571	0.25	0.625	0.222222	0.444444	1	0.333333	0.615385	0.714286	0.571429	0.857143	0.642857	0.6	0.4375	0.4375
	STDEV	#DIV/0!	#DIV/0!	#DIV/0!	#DIV/0!	#DIV/0!	#DIV/0!	#DIV/0!	#DIV/0!	#DIV/0!	#DIV/0!	#DIV/0!	#DIV/0!	#DIV/0!	#DIV/0!	#DIV/0!	0	0.707107	0.57735	0.57735	1.52753	1	0.5	0	0	0.894427	0.516398	0.816497	0.894427	0	1.06904	1.13389	0.755929	0.786796	0.786796	0.46291	0.744024	0.440959	0.726483	1.11803	0.5	0.767948	0.61125	0.755929	0.949262	0.744946	0.632456	0.629153	0.512348
	Normalized Time (hours)	-8.25	-8.25	-8.16667	-8.08333	-8	-7.91667	-7.83333	-7.75	-7.66667	-7.58333	-7.5	-7.41667	-7.33333	-7.25	-7.16667	-7.08333	-7	-6.91667	-6.83333	-6.75	-6.66667	-6.58333	-6.5	-6.41667	-6.33333	-6.25	-6.16667	-6.08333	-6	-5.91667	-5.83333	-5.75	-5.66667	-5.58333	-5.5	-5.41667	-5.33333	-5.25	-5.16667	-5.08333	-5	-4.91667	-4.83333	-4.75	-4.66667	-4.58333	-4.5	-4.41667
rab5DN ventral oligodendrocyte cell number	Normalized Frame #	-121	-120	-119	-118	-117	-116	-115	-114	-113	-112	-111	-110	-109	-108	-107	-106	-105	-104	-103	-102	-101	-100	-99	-98	-97	-96	-95	-94	-93	-92	-91	-90	-89	-88	-87	-86	-85	-84	-83	-82	-81	-80	-79	-78	-77	-76	-75	-74
1	Average ensheathments lost per frame
2				0	1	0	0	0	1	1	0	0	0	1	0	0	0	0	0	0	0	0	0	0	1	0	0	1	0	0	0	1	0	0	0	0	0	0	1	0	0	1	0	2	0	0	1	0	2
3
4
5																																							0	0	1	1	1	2	0	0	0	0	1
6
7
8
9
10
11
12
13
14																																																0	1
15
16					0	1	0	0	0	2	0	1	0	0	0	1	2	0	1	1	0	2	1	0	1	0	0	0	0	1	0	2	1	0	2	2	1	0	0	2	1	1	1	0	0	0	1	1	1
17																																						0	1	1	1	0	0	0	1	0	0	0	0
18
	AVG	#DIV/0!	#DIV/0!	0	0.5	0.5	0	0	0.5	1.5	0	0.5	0	0.5	0	0.5	1	0	0.5	0.5	0	1	0.5	0	1	0	0	0.5	0	0.5	0	1.5	0.5	0	1	1	0.5	0	0.5	0.75	0.75	0.75	0.5	1	0.25	0	0.5	0.2	1
	STDEV	#DIV/0!	#DIV/0!	#DIV/0!	0.707107	0.707107	0	0	0.707107	0.707107	0	0.707107	0	0.707107	0	0.707107	1.41421	0	0.707107	0.707107	0	1.41421	0.707107	0	0	0	0	0.707107	0	0.707107	0	0.707107	0.707107	0	1.41421	1.41421	0.707107	0	0.57735	0.957427	0.5	0.5	0.57735	1.1547	0.5	0	0.57735	0.447214	0.707107
	Normalized Time (hours)	-10.0833	-10	-9.91667	-9.83333	-9.75	-9.66667	-9.58333	-9.5	-9.41667	-9.33333	-9.25	-9.16667	-9.08333	-9	-8.91667	-8.83333	-8.75	-8.66667	-8.58333	-8.5	-8.41667	-8.33333	-8.25	-8.16667	-8.08333	-8	-7.91667	-7.83333	-7.75	-7.66667	-7.58333	-7.5	-7.41667	-7.33333	-7.25	-7.16667	-7.08333	-7	-6.91667	-6.83333	-6.75	-6.66667	-6.58333	-6.5	-6.41667	-6.33333	-6.25	-6.16667
[truncated: 227 more columns]
