# Supplementary material for: Early myelination involves the dynamic and repetitive ensheathment of axons which resolves through a low and consistent stabilization rate
Source: eLife. 2023 Apr 20;12:e82111. doi: 10.7554/eLife.82111 (PMC10198724; doi:10.7554/eLife.82111)
Supplement: Figure 9—source data 1. [file elife-82111-fig9-data1.xlsx]

## Sheet: Control_ventral
	Fig 9B		Fig 9C	Fig 9D	Fig 9E			Fig 9F	Fig 9G	Fig 9H	Fig 9I
Control ventral oligodendrocyte cell number	Total Ensheathments attempts	Total ensheathments attempts before peak	Peak sheath number	Sheath number at 3dpf	Final sheath number	Final AVG sheath length	Final Total sheath length	Net sheaths lost from Peak to 4dpf	Peak/total ensheathment %	Final/peak ensheathments %	Final/total ensheathments %
1	51	50	15	11	8	39.9168	319.334	7	30	53.3333	15.6863
2	56	55	17	15	11	32.6258	358.883	6	30.9091	64.7059	19.6429
3	45	45	12	9	6	24.146	144.876	6	26.6667	50	13.3333
4	60	60	17	16	12	22.0677	264.813	5	28.3333	70.5882	20
5	24	24	7	7	5	37.9747	189.874	2	29.1667	71.4286	20.8333
6	34	32	12	8	6	32.8721	197.233	6	37.5	50	17.6471
7	80	77	23	14	12	20.9472	251.366	11	29.8701	52.1739	15
8	102	96	19	16	11	42.0943	463.037	8	19.7917	57.8947	10.7843
9	55	55	18	12	9	34.4697	310.227	9	32.7273	50	16.3636
10	174	162	27	22	18	39.1548	704.786	9	16.6667	66.6667	10.3448
11	69	68	16	13	9	38.064	342.576	7	23.5294	56.25	13.0435
12	65	65	17	13	10	34.6367	346.367	7	26.1538	58.8235	15.3846
13	158	158	25	22	16	25.6271	410.034	9	15.8228	64	10.1266
14	109	102	22	15	13	45.6107	592.939	9	21.5686	59.0909	11.9266
15	70	69	13	9	7	31.0545	217.382	6	18.8406	53.8462	10
16	86	82	22	15	11	45.1172	496.29	11	26.8293	50	12.7907
17	45	44	14	11	8	30.9	247.2	6	31.8182	57.1429	17.7778
18	89	80	23	18	12	25.6304	307.565	11	28.75	52.1739	13.4831

## Sheet: Rab5WT_ventral
	Fig 9B		Fig 9C	Fig 9D	Fig 9E			Fig 9F	Fig 9G	Fig 9H	Fig 9I
Rab5WT ventral oligodendrocyte cell number	Total Ensheathments attempts	Total ensheathments attempts before peak	Peak sheath number	Sheath number at 3dpf	Final sheath number	Final AVG sheath length	Final Total sheath length	Net sheaths lost from Peak to 4dpf	Peak/total ensheathment %	Final/peak ensheathments %	Final/total ensheathments %
1	46	46	15	15	9	21.2676	191.409	6	32.6087	60	19.5652
2	53	53	12	8	6	20.1141	120.685	6	22.6415	50	11.3208
3	68	57	19	12	12	31.1156	373.388	7	33.3333	63.1579	17.6471
4	81	81	20	15	13	43.0952	560.238	7	24.6914	65	16.0494
5	71	63	16	13	11	33.8292	372.121	5	25.3968	68.75	15.493
6	138	133	28	22	15	31.8835	478.252	13	21.0526	53.5714	10.8696
7	99	92	15	11	11	28.7994	316.793	4	16.3043	73.3333	11.1111
8	71	65	15	11	8	32.5732	260.585	7	23.0769	53.3333	11.2676
9	55	55	14	13	8	25.418	203.344	6	25.4545	57.1429	14.5455
10	70	64	13	9	7	38.0905	266.633	6	20.3125	53.8462	10
11	94	91	17	11	10	24.9387	249.387	7	18.6813	58.8235	10.6383
12	141	140	32	23	18	32.5503	585.905	14	22.8571	56.25	12.766
13	43	39	12	7	6	25.594	153.564	6	30.7692	50	13.9535
14	74	72	22	16	12	36.3313	435.975	10	30.5556	54.5455	16.2162
15	89	81	16	10	9	55.0942	495.848	7	19.7531	56.25	10.1124
16	66	66	17	15	9	26.5364	238.827	8	25.7576	52.9412	13.6364
17	133	132	25	19	13	30.7765	400.095	12	18.9394	52	9.77444
18	72	70	17	10	10	43.7498	437.498	7	24.2857	58.8235	13.8889

## Sheet: rab5dn_ventral
	Fig 9B		Fig 9C	Fig 9D	Fig 9E			Fig 9F	Fig 9G	Fig 9H	Fig 9I
rab5DN ventral oligodendrocyte cell number	Total Ensheathments attempts	Total ensheathments attempts before peak	Peak sheath number	Sheath number at 3dpf	Final sheath number	Final AVG sheath length	Final Total sheath length	Net sheaths lost from Peak to 4dpf	Peak/total ensheathment %	Final/peak ensheathments %	Final/total ensheathments %
1	22	21	10	8	6	38.6257	231.754	4	47.619	60	27.2727
2	67	66	13	13	6	29.1262	174.757	7	19.697	46.1538	8.95522
3	27	21	7	6	3	32.0644	96.1933	4	33.3333	42.8571	11.1111
4	52	51	20	10	9	59.9664	539.698	11	39.2157	45	17.3077
5	67	65	16	13	10	30.6914	306.914	6	24.6154	62.5	14.9254
6	62	60	16	10	6	40.1419	240.852	10	26.6667	37.5	9.67742
7	73	65	19	10	7	48.0163	336.114	12	29.2308	36.8421	9.58904
8	48	43	19	9	8	45.1185	360.948	11	44.186	42.1053	16.6667
9	69	68	19	9	8	43.2976	346.381	11	27.9412	42.1053	11.5942
10	49	44	12	4	4	30.4621	121.848	8	27.2727	33.3333	8.16327
11	60	60	16	13	7	29.5334	206.734	9	26.6667	43.75	11.6667
12	165	161	29	19	11	40.9195	450.115	18	18.0124	37.931	6.66667
13	72	72	20	10	6	46.1377	276.826	14	27.7778	30	8.33333
14	104	103	20	16	7	27.5356	192.749	13	19.4175	35	6.73077
15	76	72	17	10	8	39.9575	319.66	9	23.6111	47.0588	10.5263
16	92	88	14	13	6	19.4405	116.643	8	15.9091	42.8571	6.52174
17	125	121	23	19	11	21.4476	235.924	12	19.0083	47.8261	8.8
18	154	141	27	20	11	52.5676	578.244	16	19.1489	40.7407	7.14286
